# Supplementary material for: BF3·OEt2 catalyzed decarbonylative arylation/C–H functionalization of diazoamides with arylaldehydes: synthesis of substituted 3-aryloxindoles
Source: Royal Society of Chemistry journal article supplement (doi:10.1039/d2ob00003b), 2022-01-01

## **Supporting Information**

### **BF<sub>3</sub>·OEt<sub>2</sub> catalyzed decarbonylative arylation/C-H functionalization of diazoamides with arylaldehydes: Synthesis of substituted 3-aryloxindoles**

Sengodagounder Muthusamy\* and Ammasi Prabu

*School of Chemistry, Bharathidasan University, Tiruchirappalli-620 024, India*

\* Tel: +91-431-2407053; Fax: +91-431-2407045; E-mail: [muthu@bdu.ac.in](mailto:muthu@bdu.ac.in)

HRMS spectra for compounds **3**, **6**, **7** and **8**

# Compound 3a

APR-541 #39 RT: 0.43 AV: 1 NL: 1.39E8  
T: FTMS + p ESI Full ms [100.0000-1000.0000]

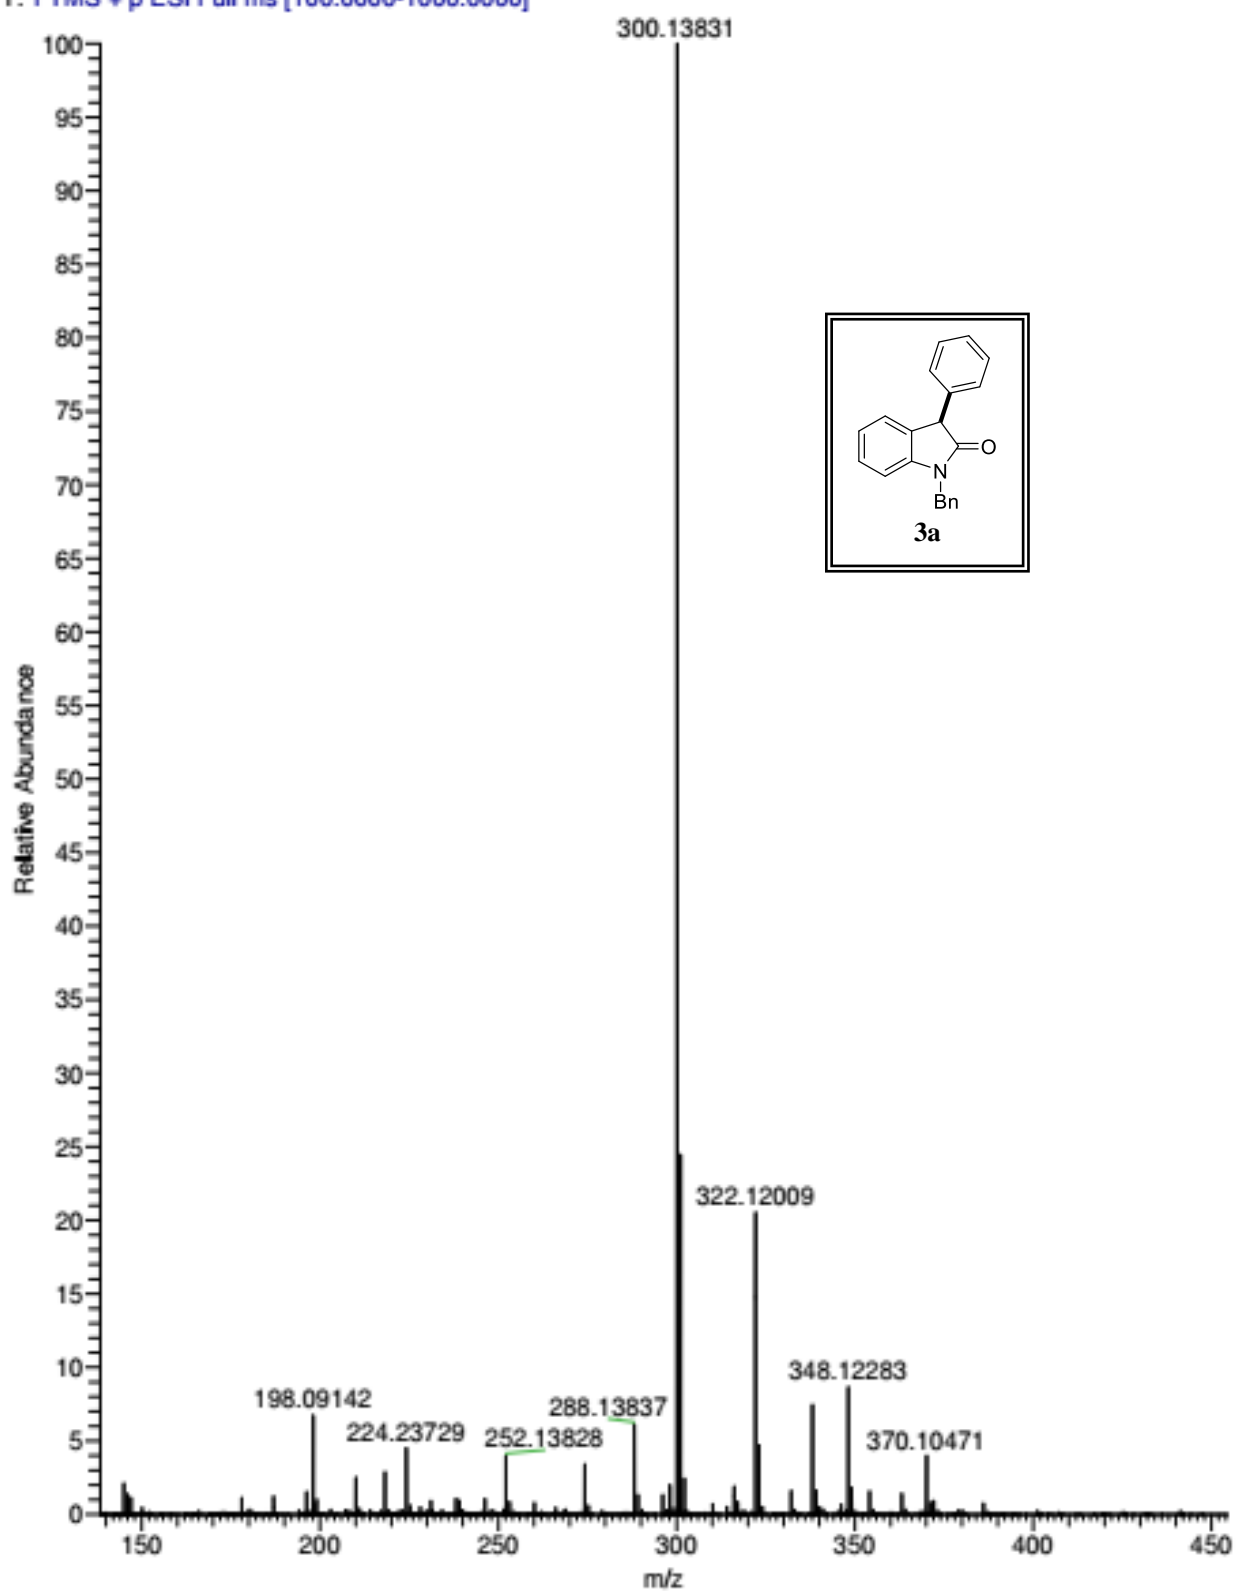

# Compound 3b

APR-414\_20201124135840 #39 RT: 0.42 AV: 1 NL: 5.97E8

T: FTMS + p ESI Full ms [100.0000-1000.0000]

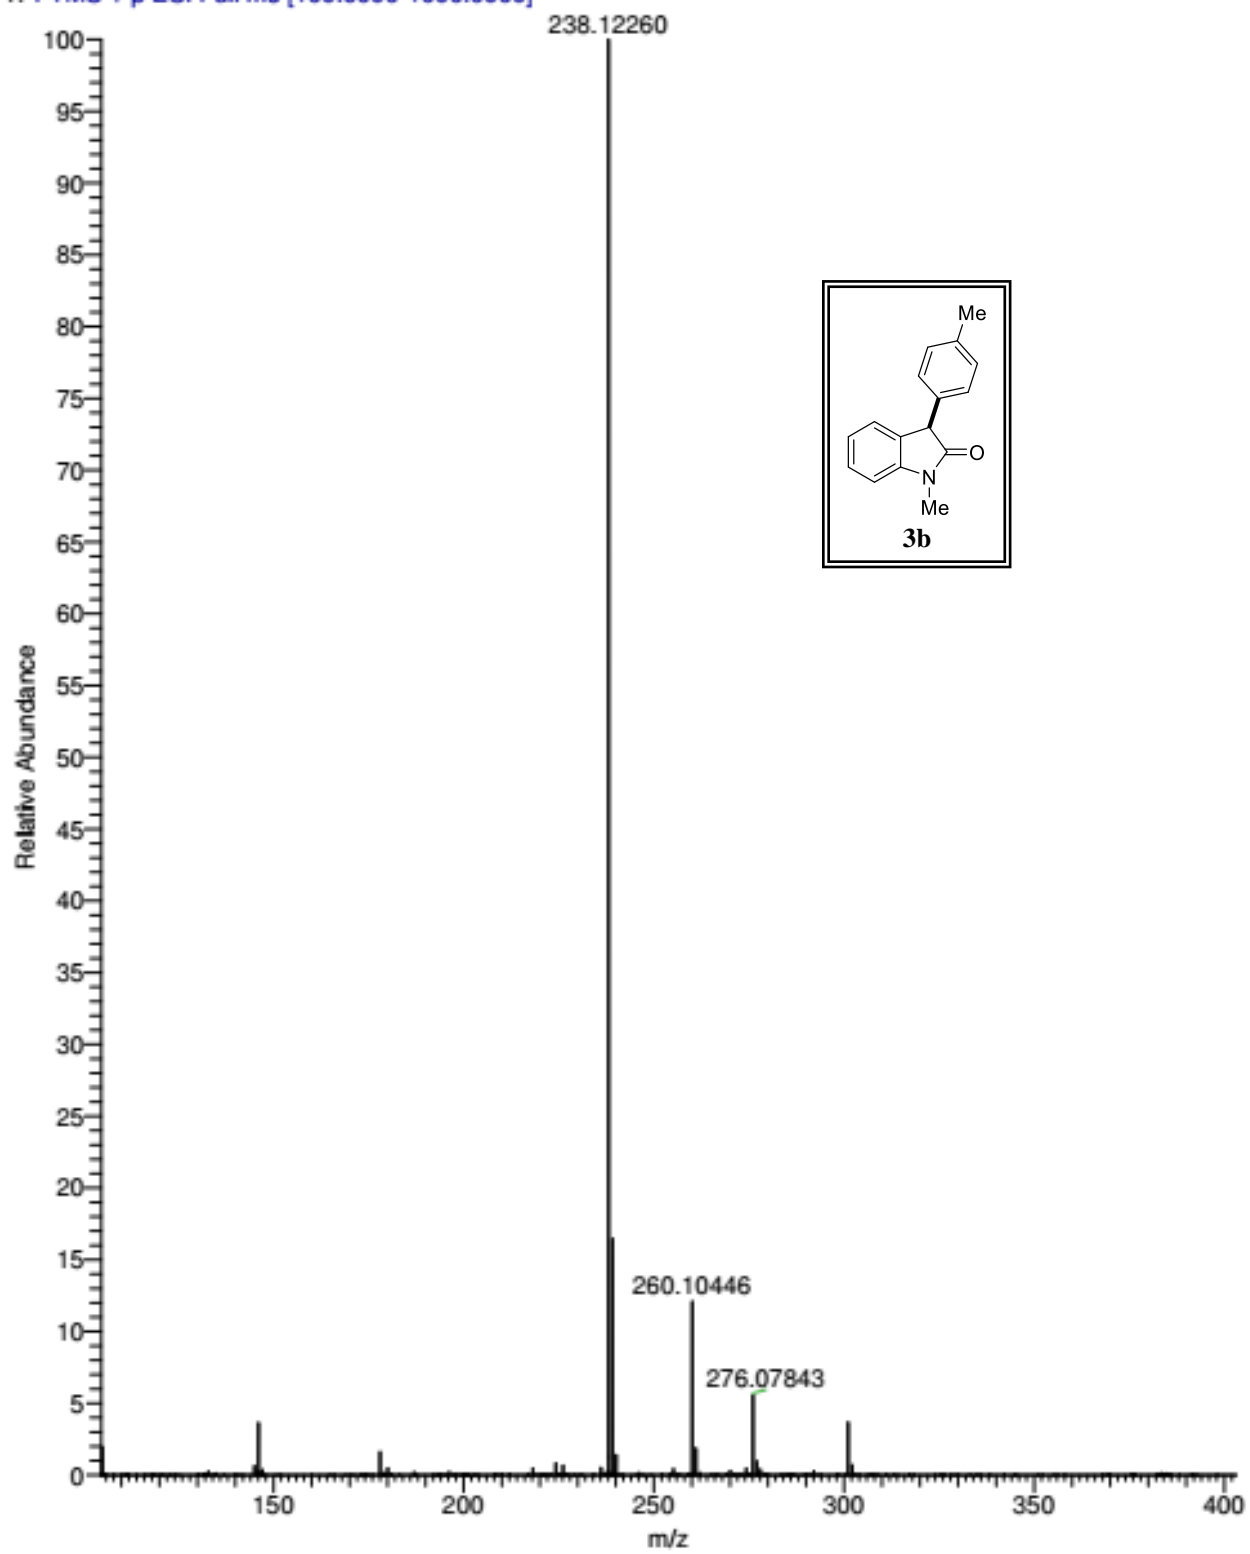

# Compound 3c

APR-421 #56 RT: 0.55 AV: 1 NL: 8.10E8  
T: FTMS + p ESI Full ms [150.0000-2000.0000]

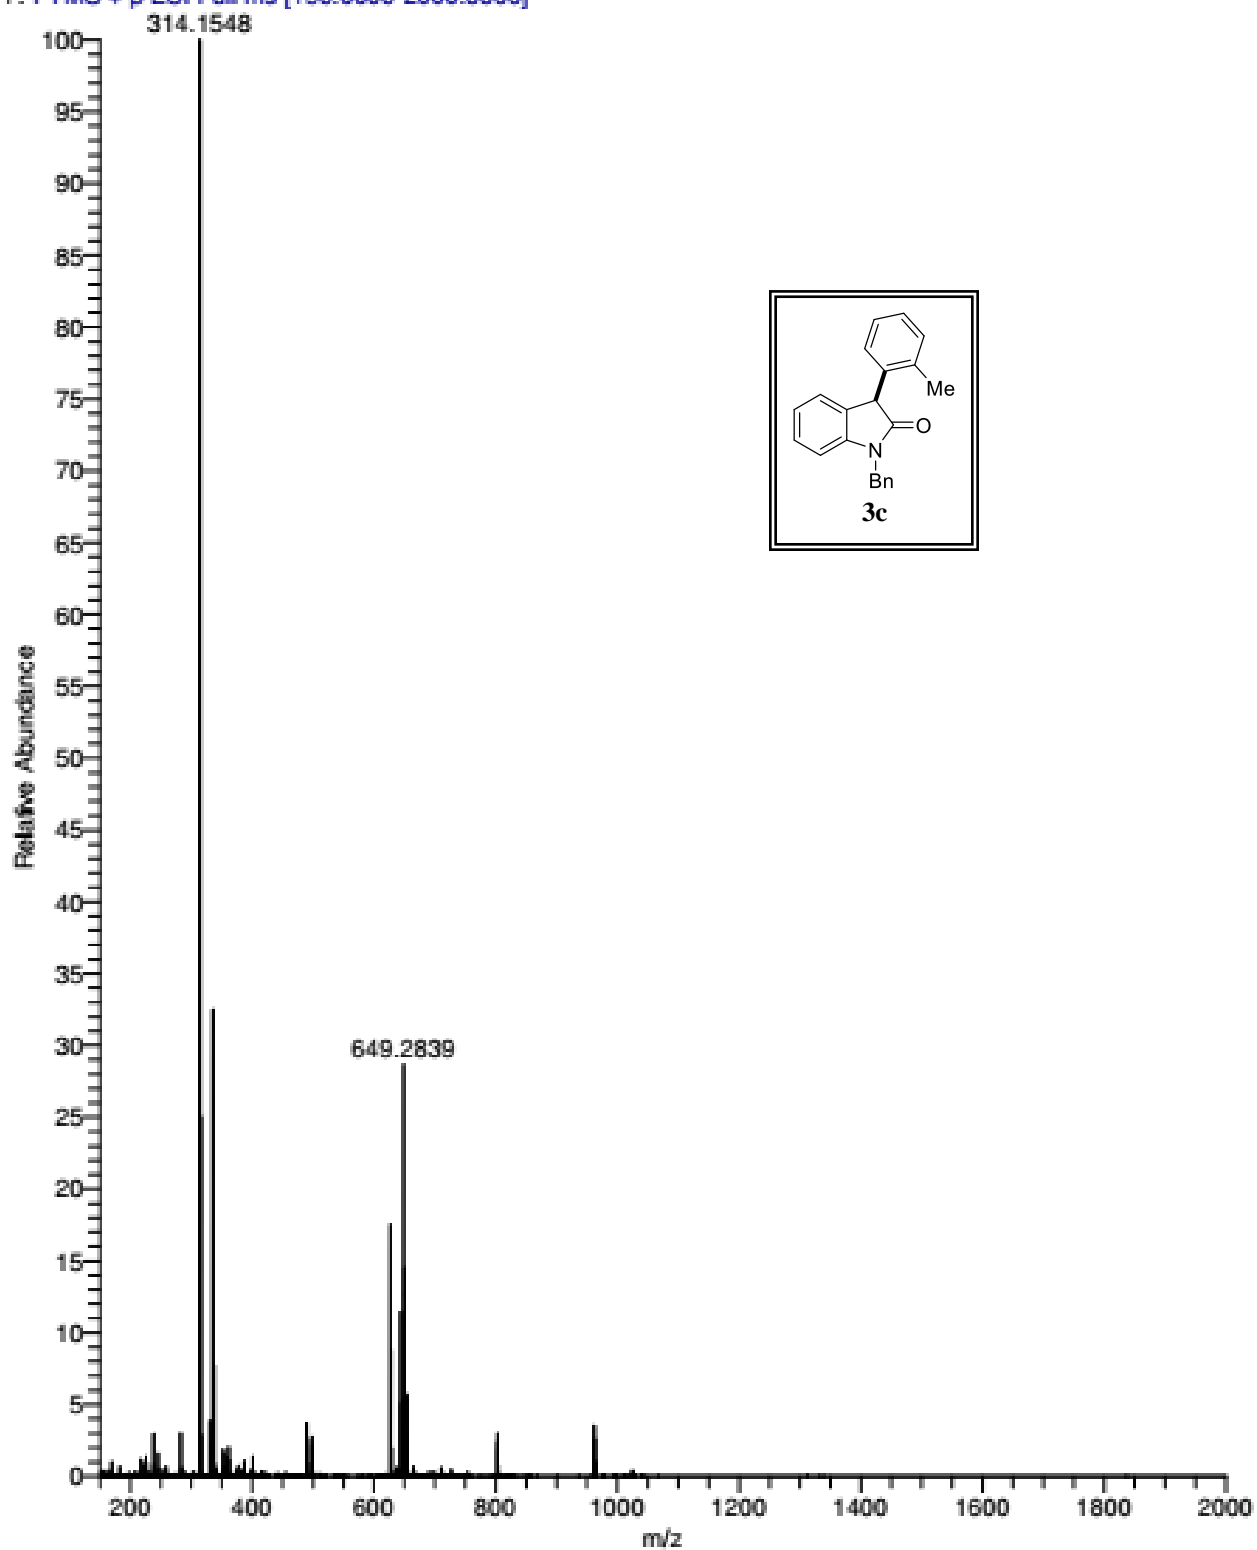

# Compound 3d

APR-515 #53 RT: 0.52 AV: 1 NL: 6.31E8  
T: FTMS + p ESI Full ms [100.0000-1000.0000]

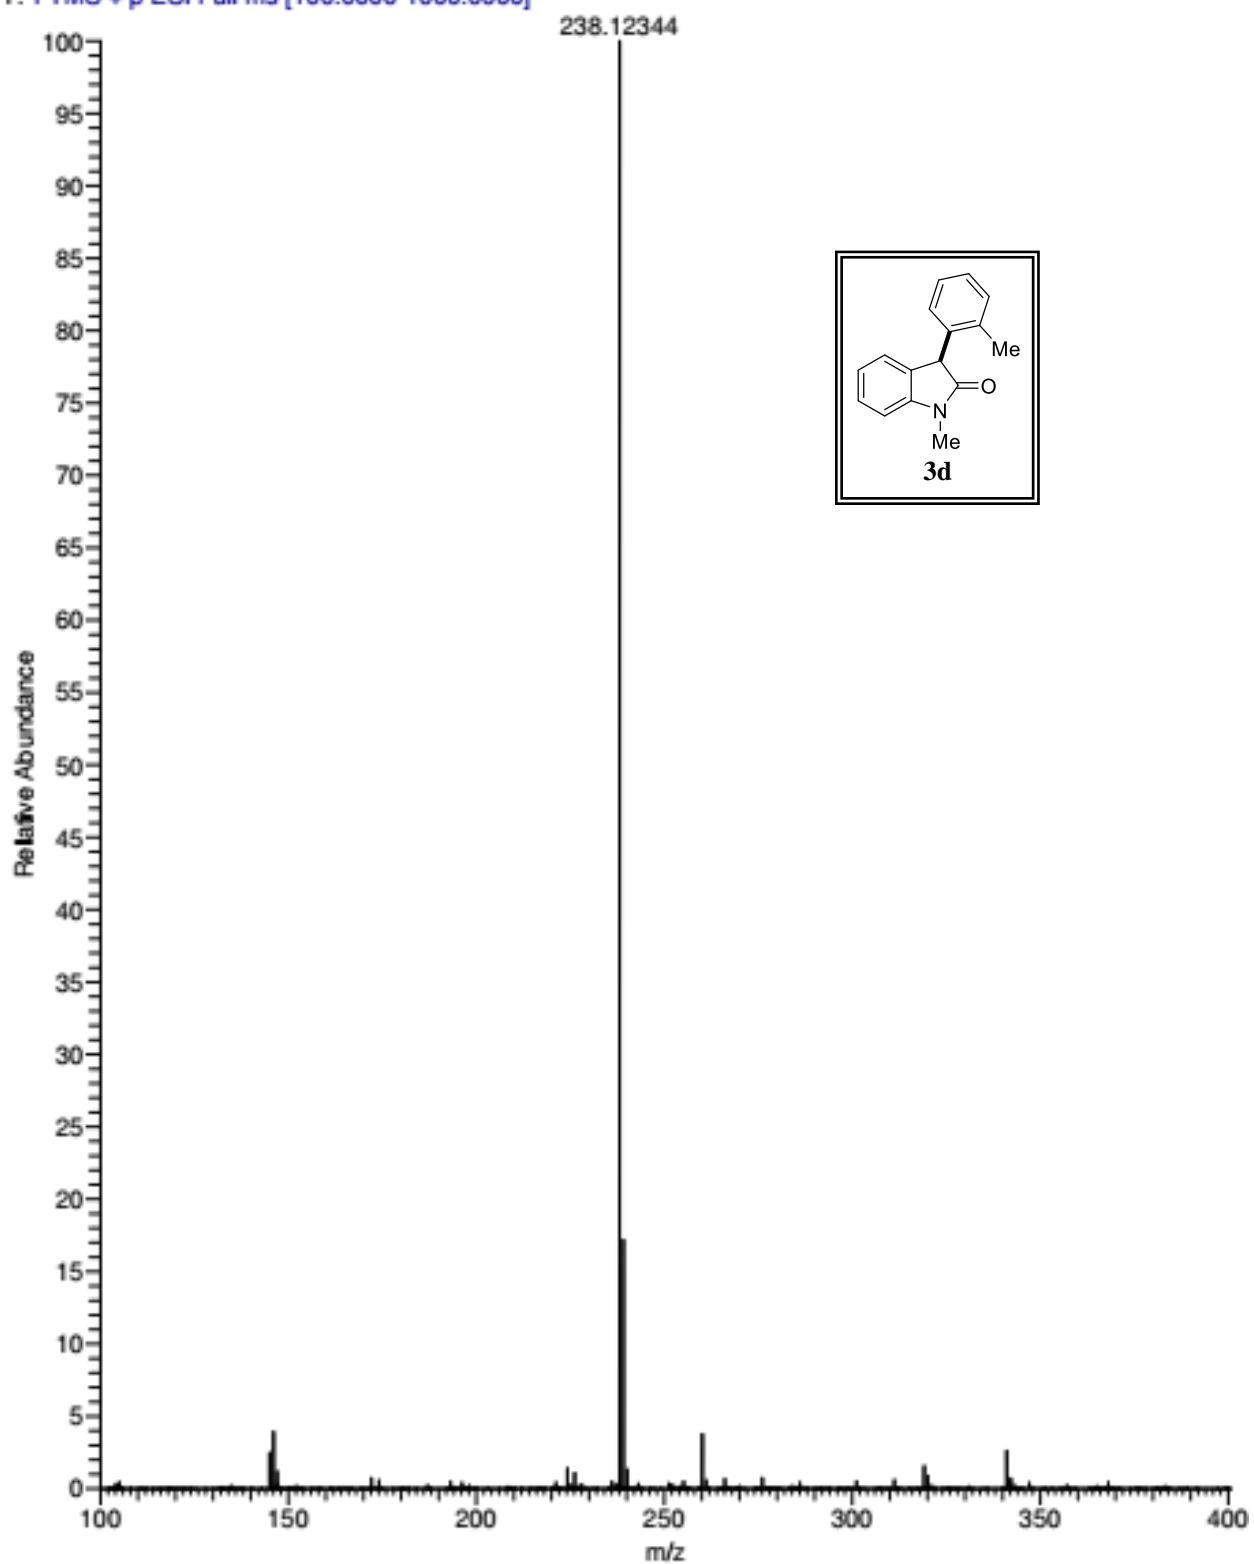

# Compound 3e

APR-424 #121 RT: 1.16 AV: 1 NL: 1.73E8  
T: FTMS + p ESI Full ms [100.0000-1000.0000]

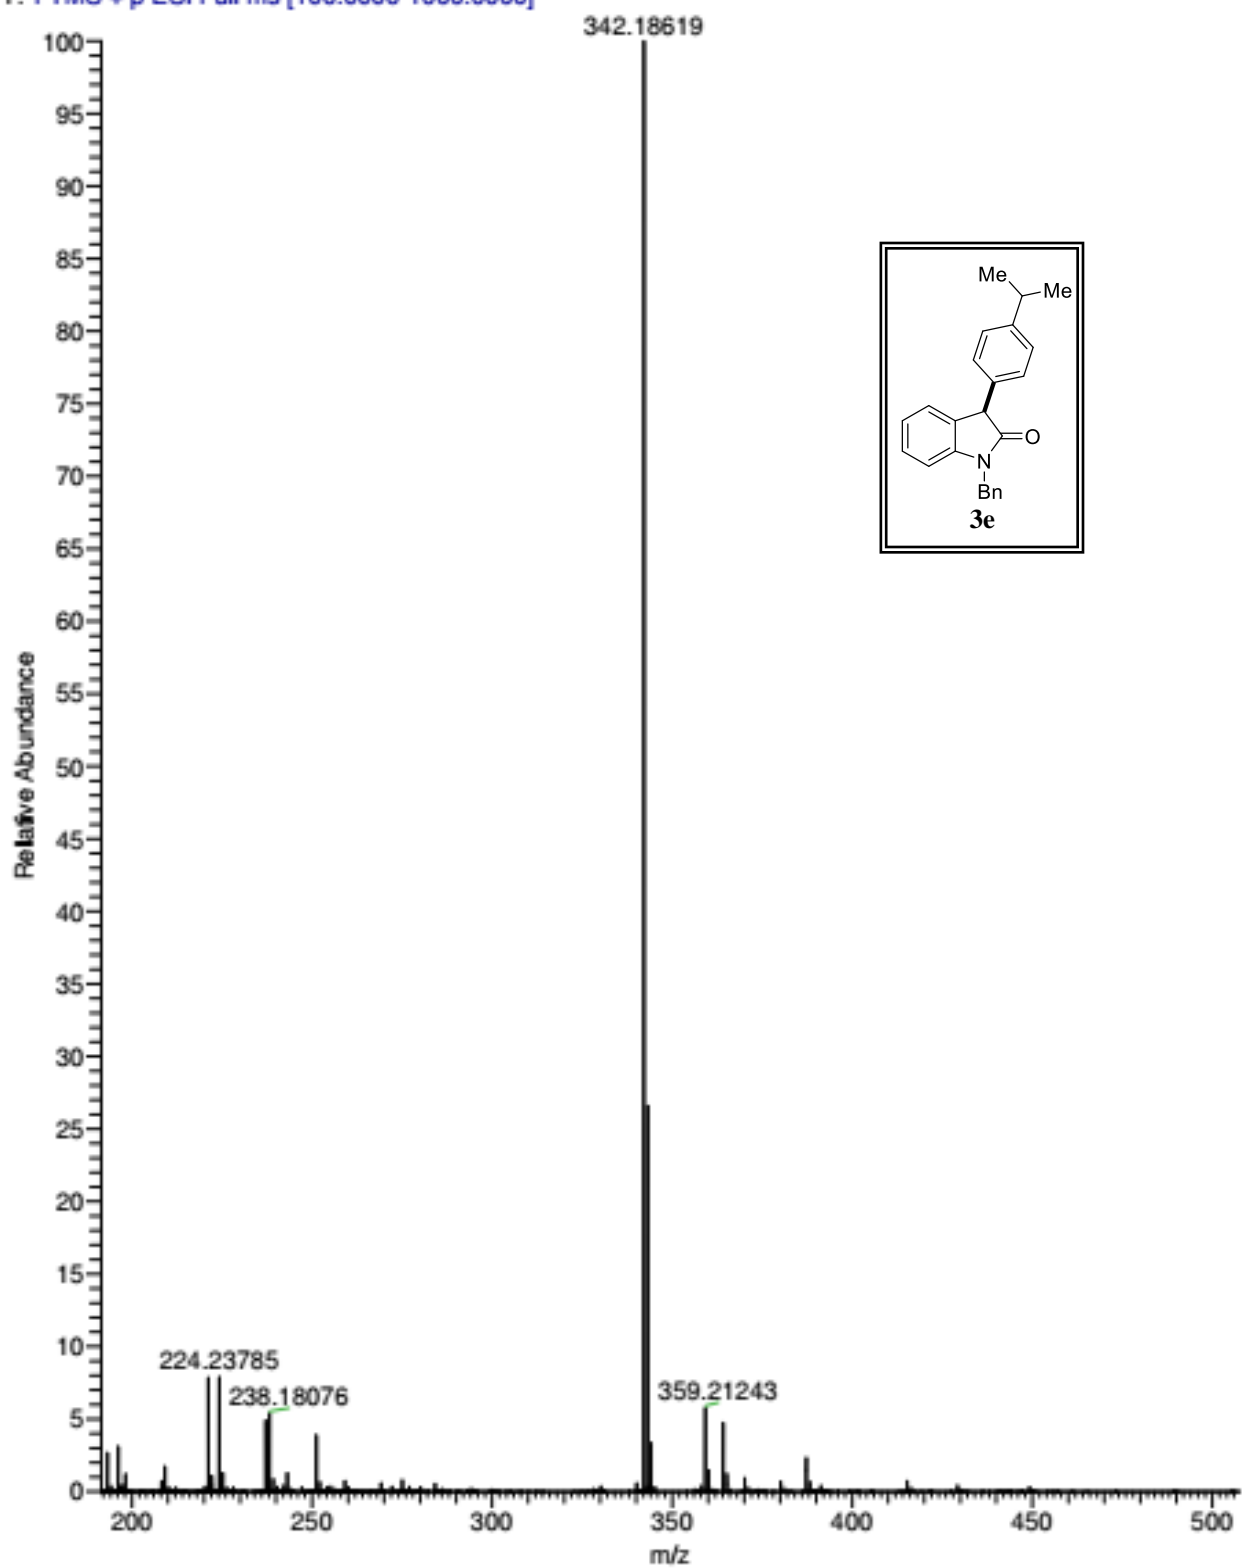

# Compound 3f

APR-412\_20201124135531 #43 RT: 0.47 AV: 1 NL: 6.55E7

T: FTMS + p ESI Full ms [100.0000-1000.0000]

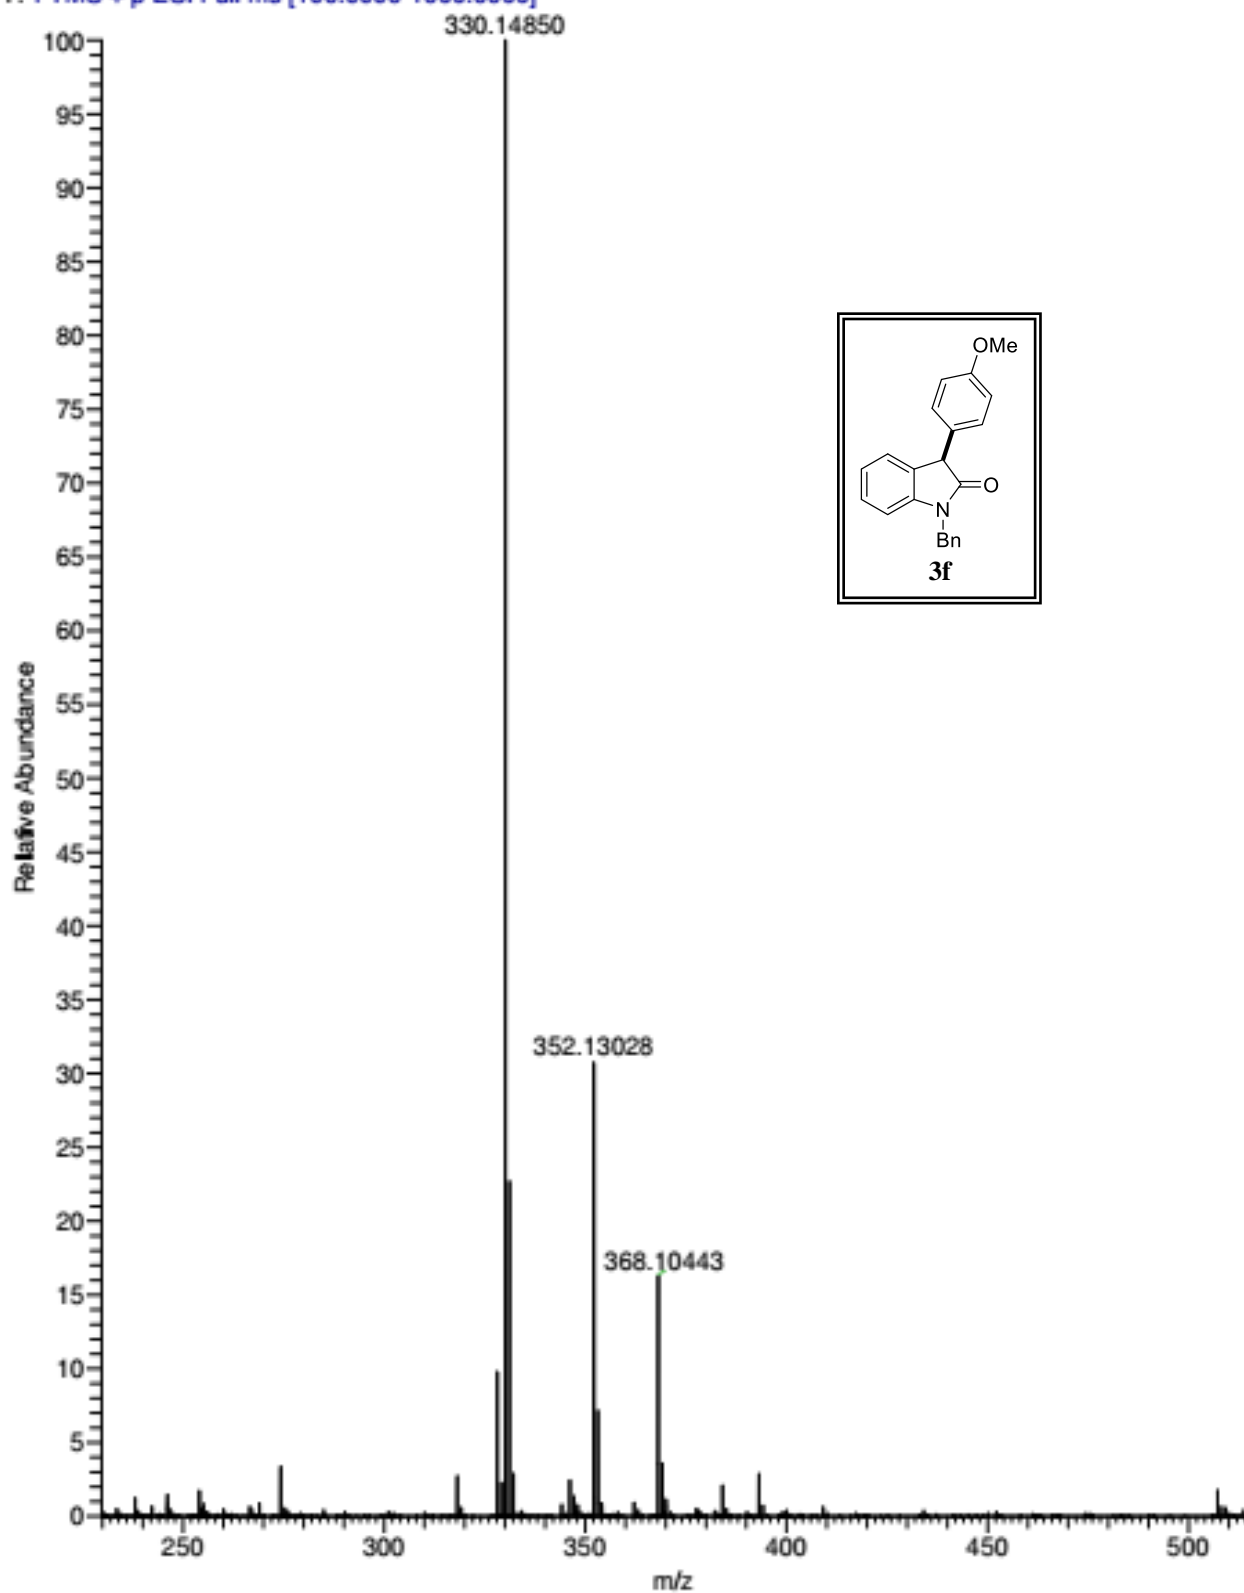

# Compound 3g

APR-581\_20200220114717 #55 RT: 0.56 AV: 1 NL: 3.51E7

T: FTMS + p ESI Full ms [100.0000-1000.0000]

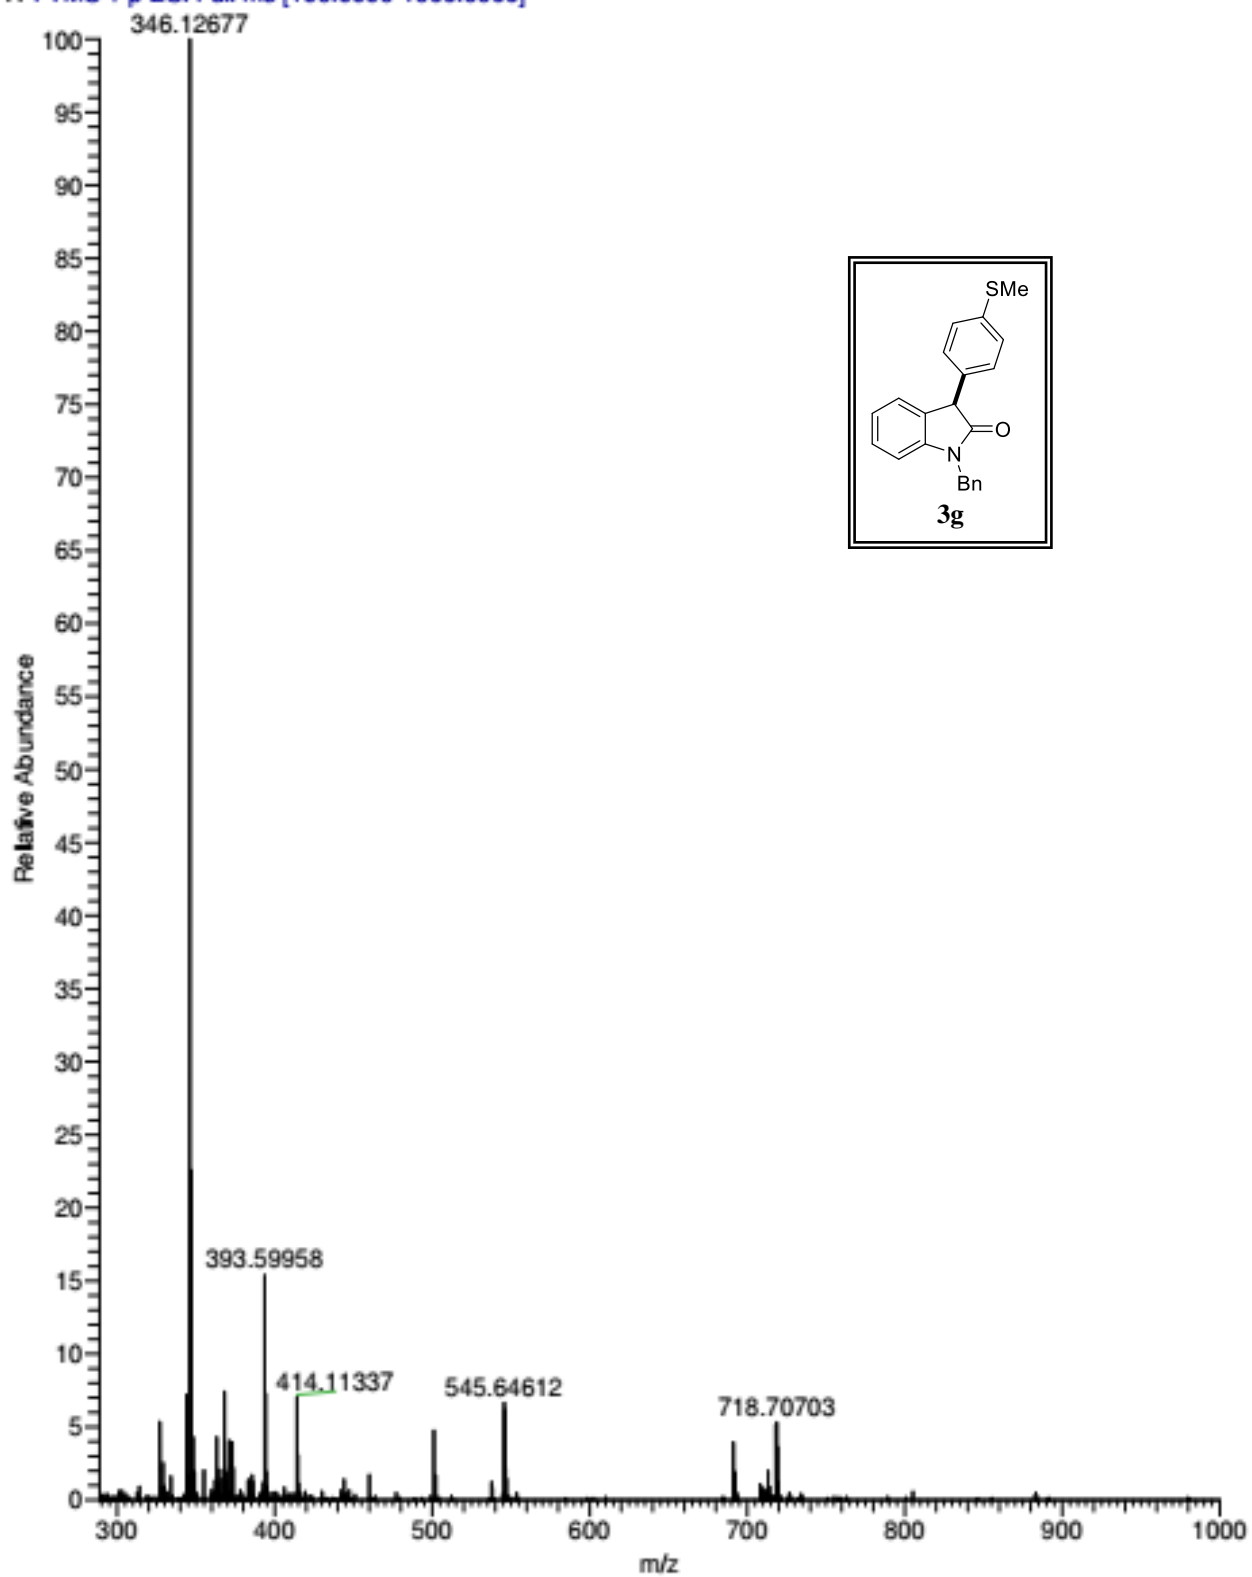



# Compound 3h

APR-401\_20190702171520 #83 RT: 0.86 AV: 1 NL: 1.21E7  
T: FTMS + p ESI Full ms [150.0000-1000.0000]

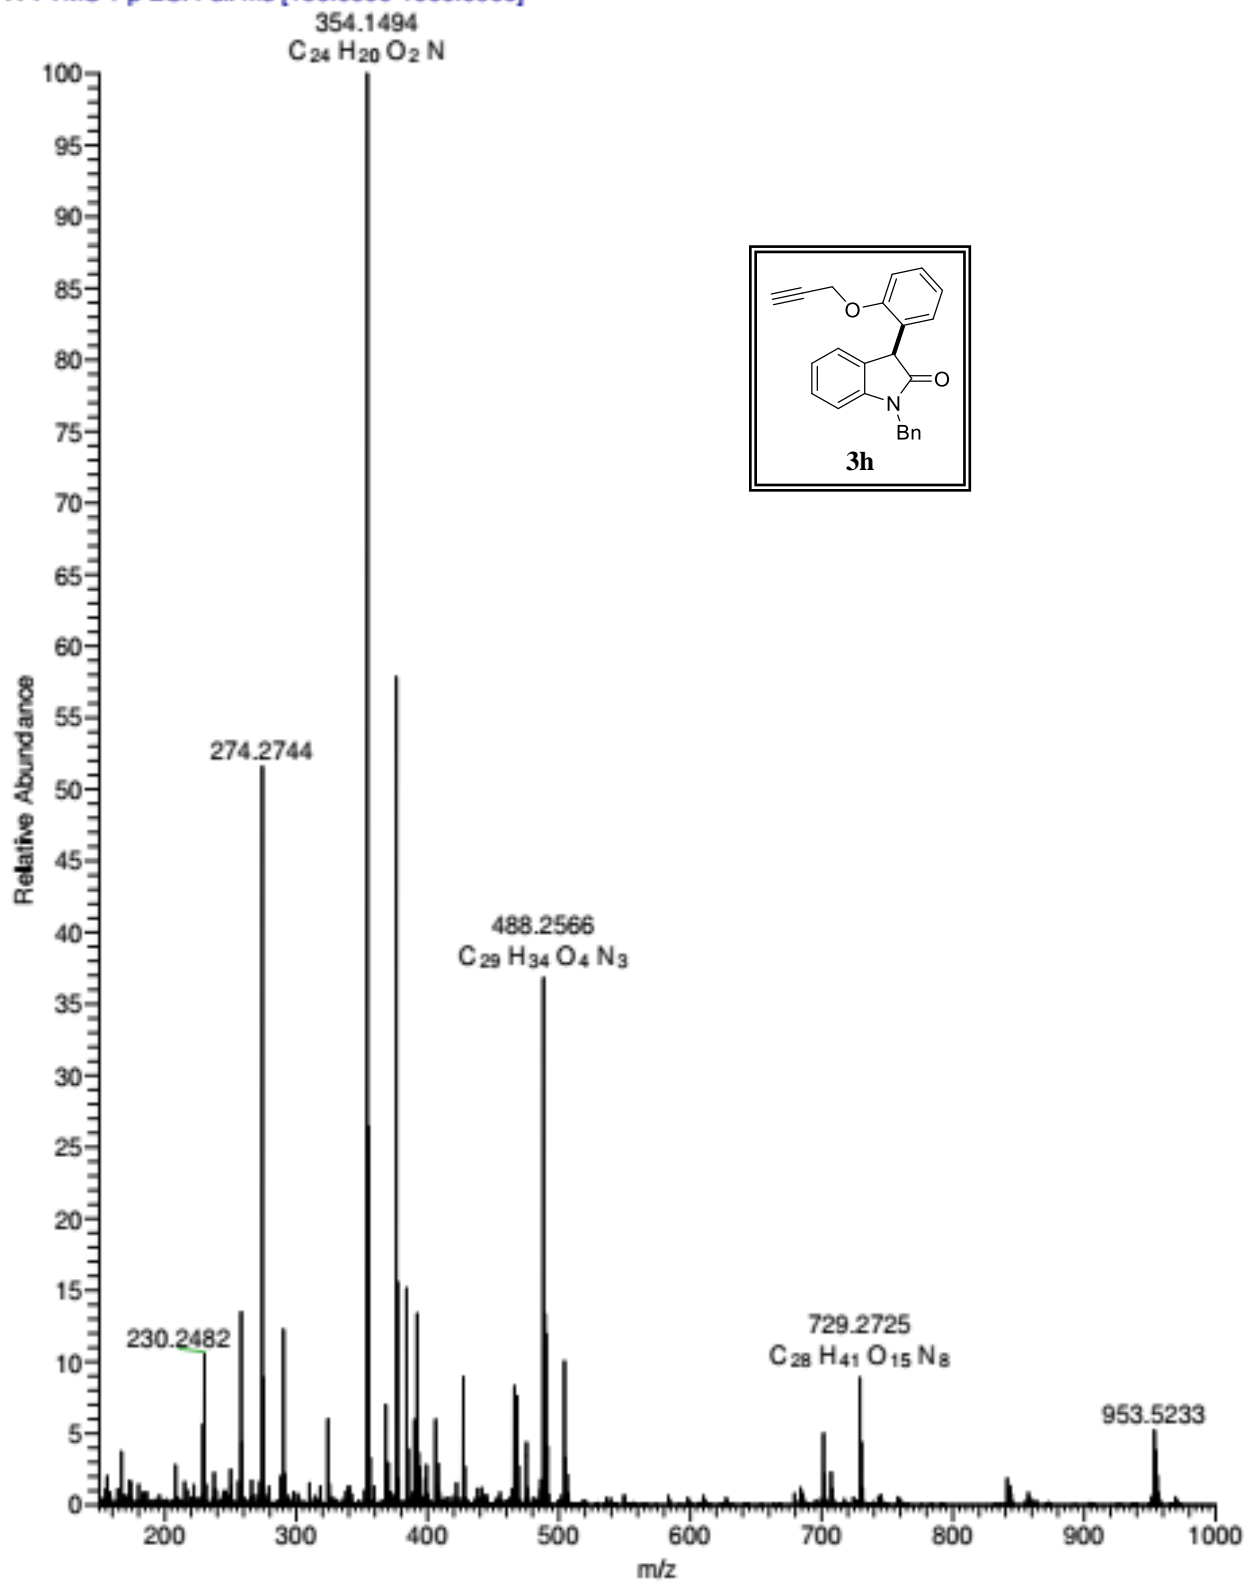

# Compound 3i

APR-462\_20210303160934 #63 RT: 0.61 AV: 1 NL: 4.92E8

T: FTMS + p ESI Full ms [100.0000-1000.0000]

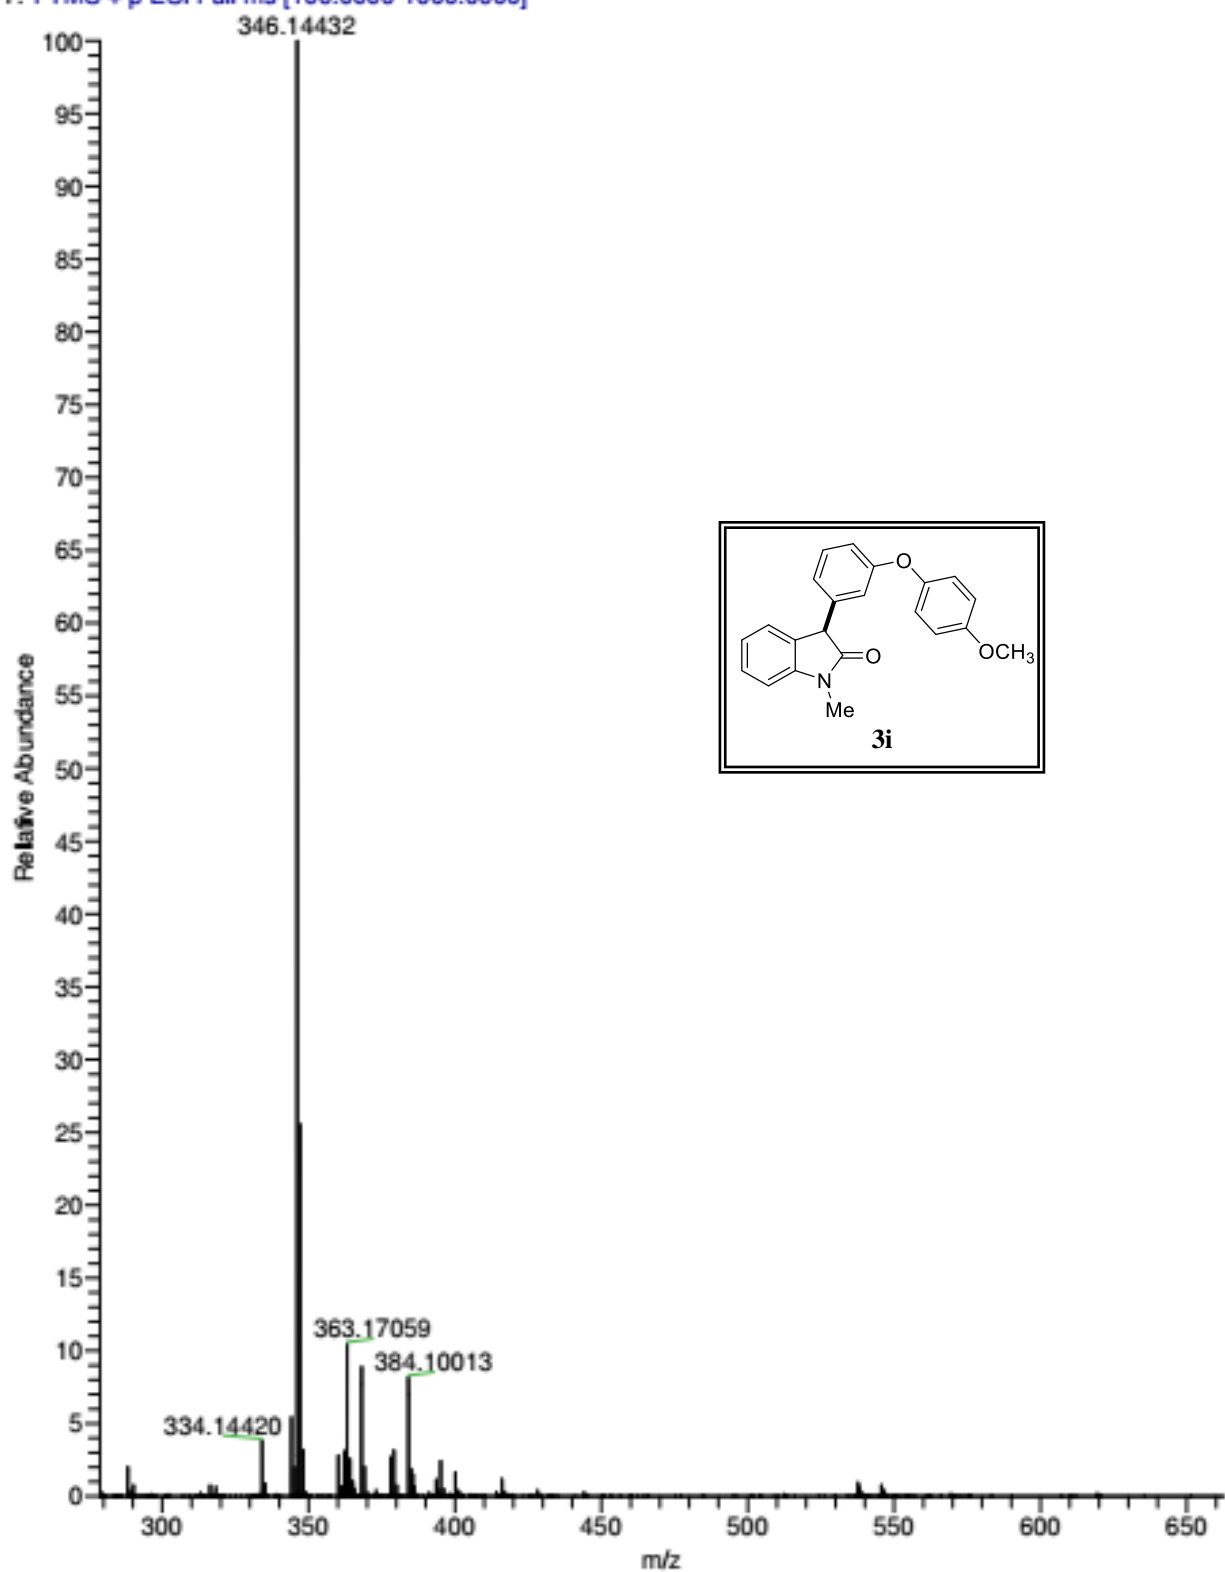

# Compound 3j

APR-504 #25 RT: 0.29 AV: 1 NL: 3.13E7  
T: FTMS + p ESI Full ms [150.0000-1000.0000]

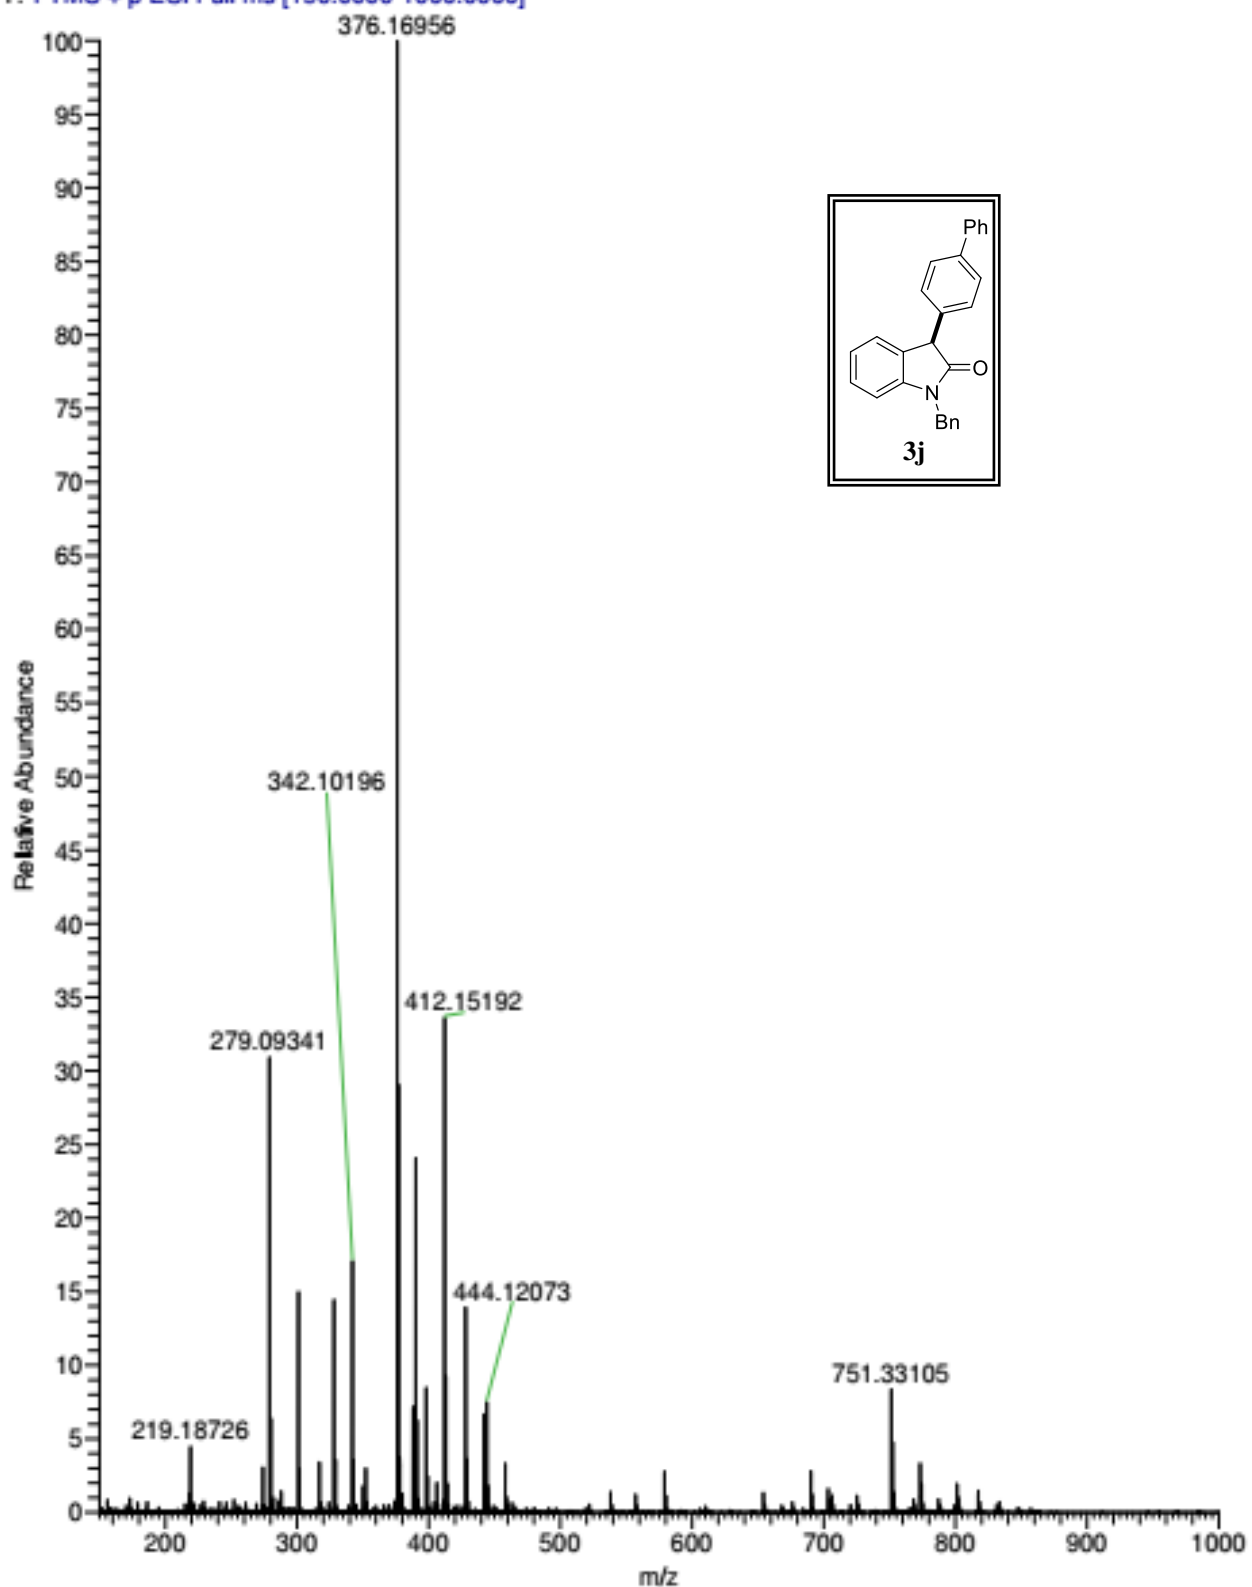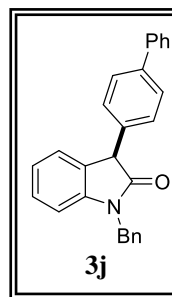

# Compound 3k

APR-501 #35 RT: 0.36 AV: 1 NL: 1.45E9  
T: FTMS + p ESI Full ms [150.0000-1000.0000]

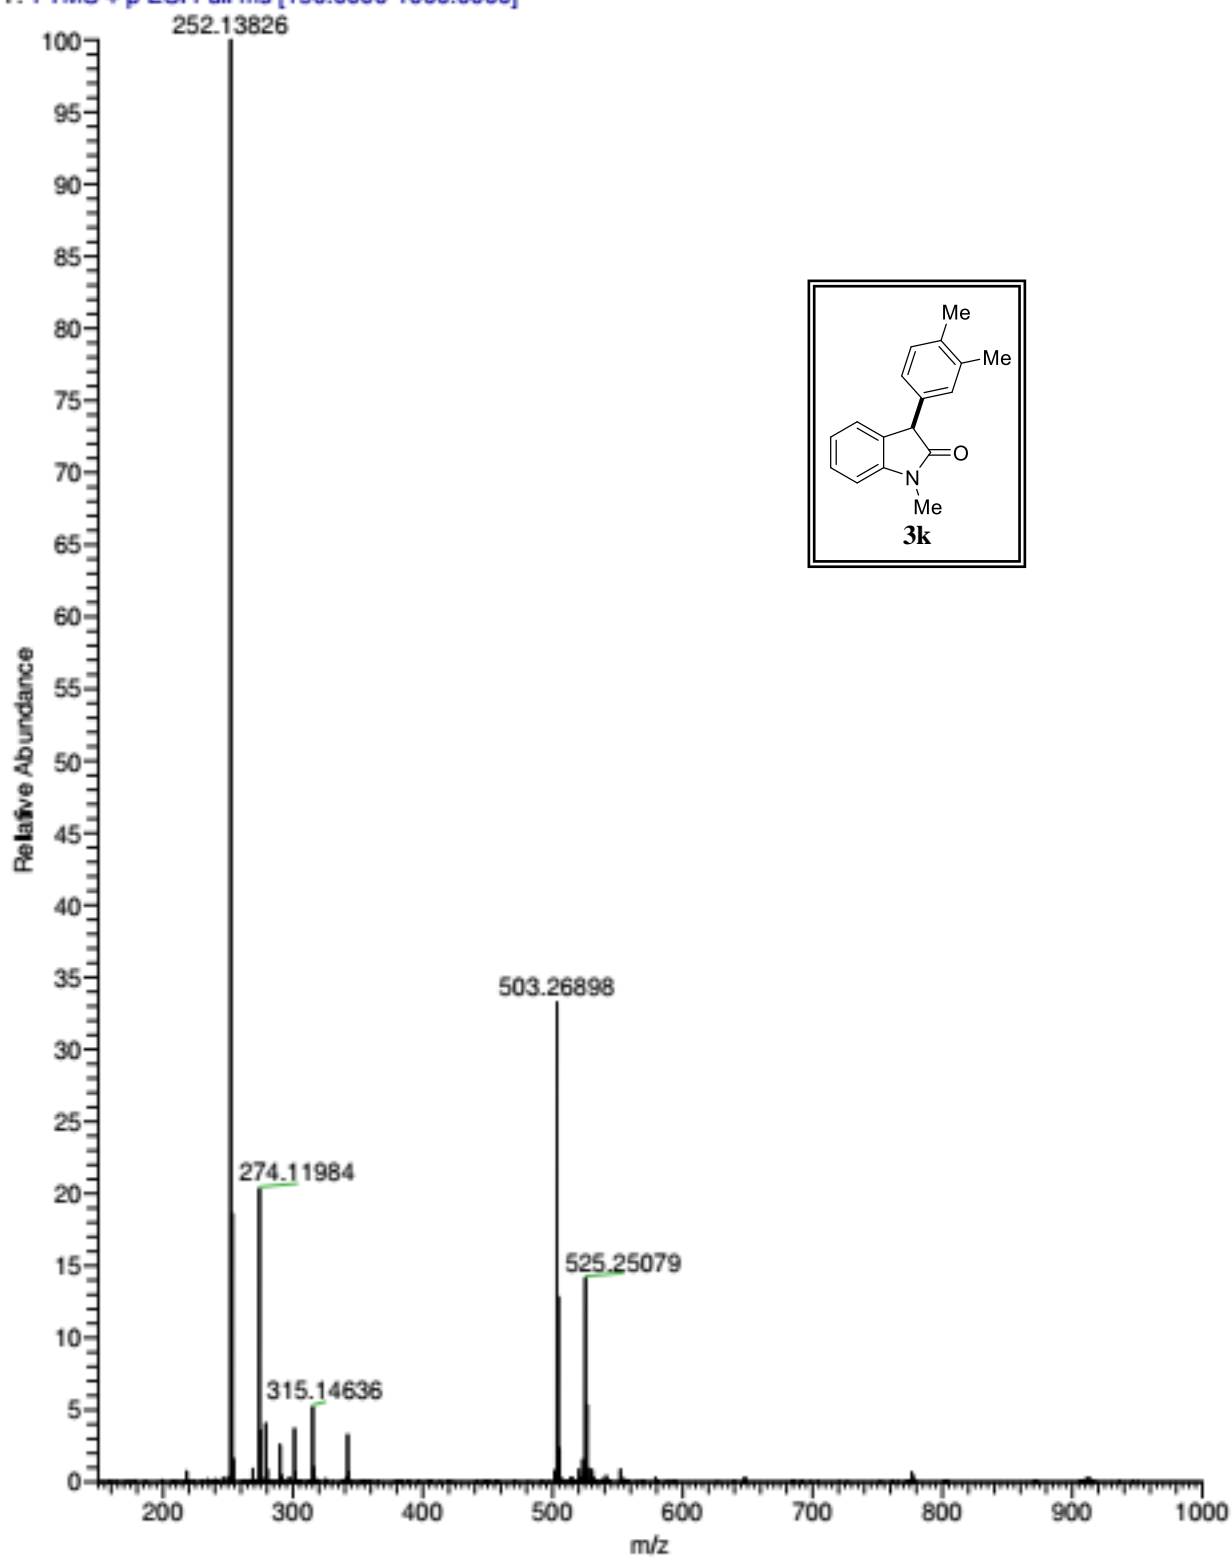

# Compound 31

APR-500 #59 RT: 0.63 AV: 1 NL: 1.34E8  
T: FTMS + p ESI Full ms [100.0000-1000.0000]

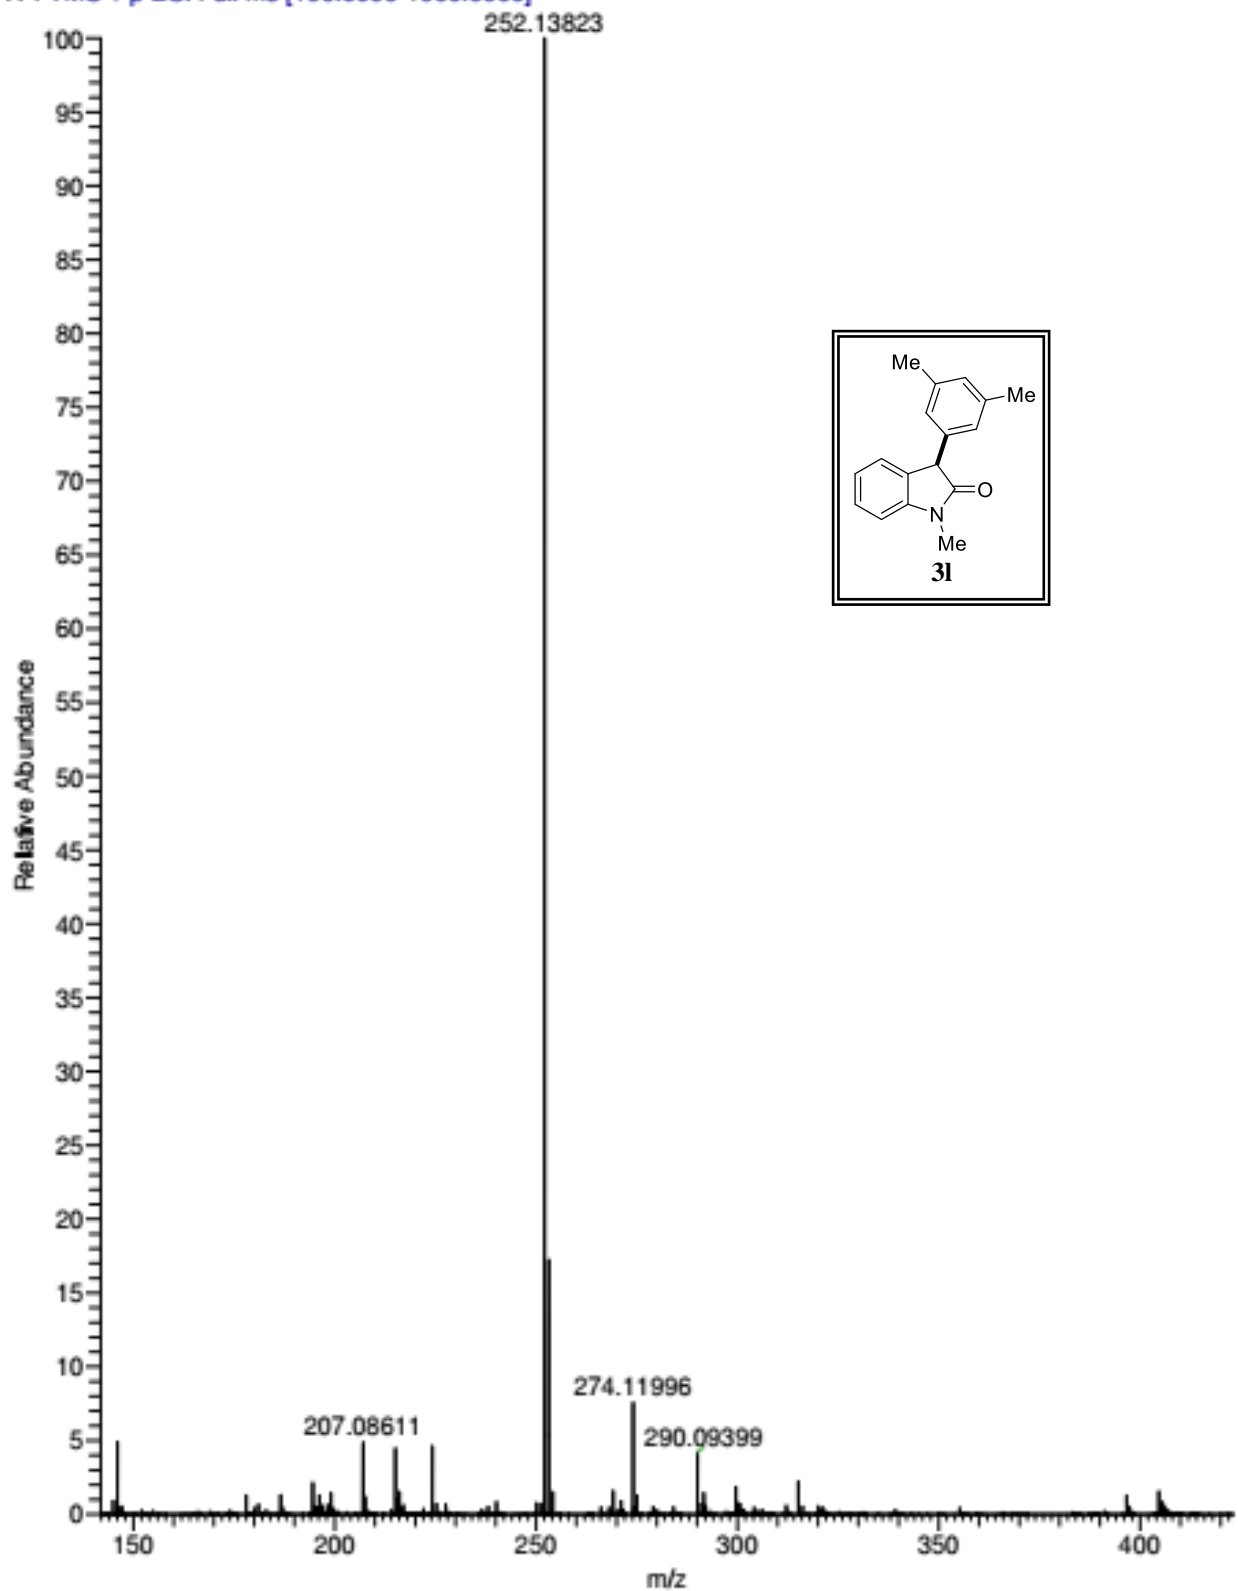

# Compound 3m

APR-502 #35 RT: 0.38 AV: 1 NL: 4.34E8  
T: FTMS + p ESI Full ms [150.0000-1000.0000]

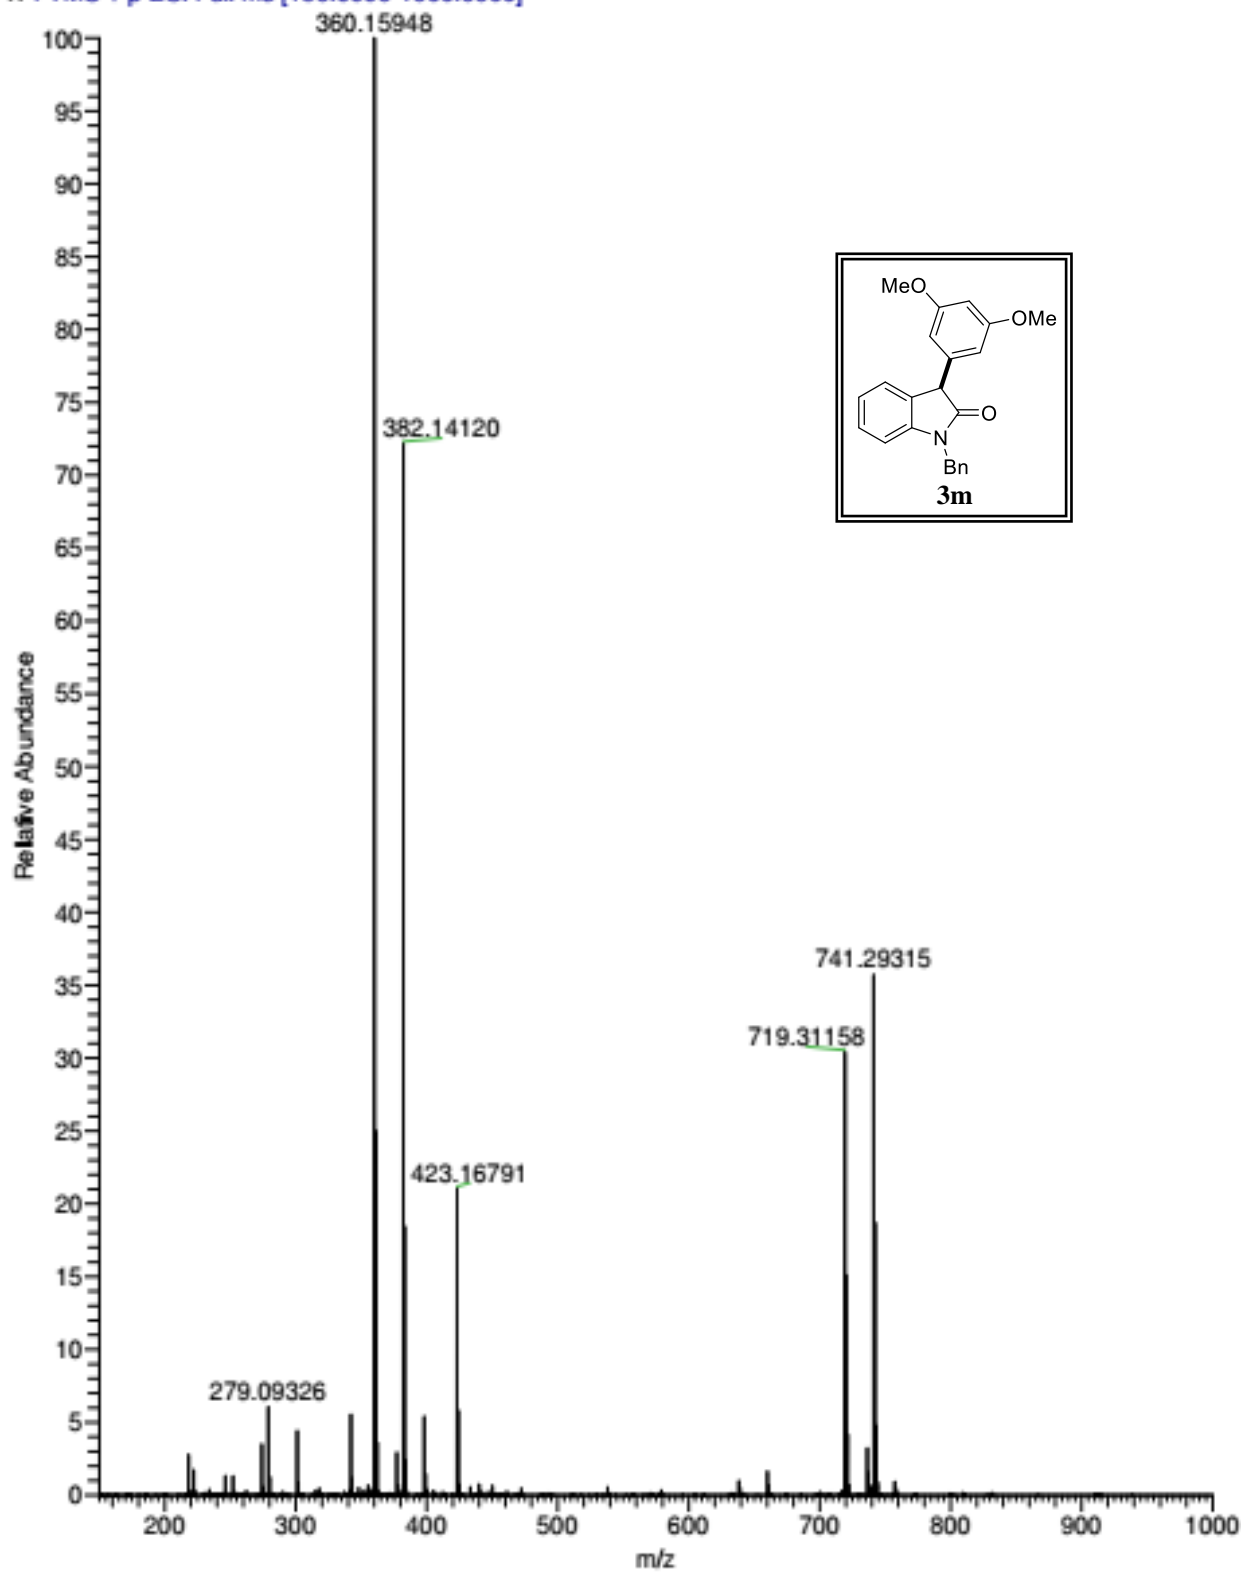

# Compound 3n

APR-503 #33 RT: 0.36 AV: 1 NL: 9.91E8  
T: FTMS + p ESI Full ms [150.0000-1000.0000]

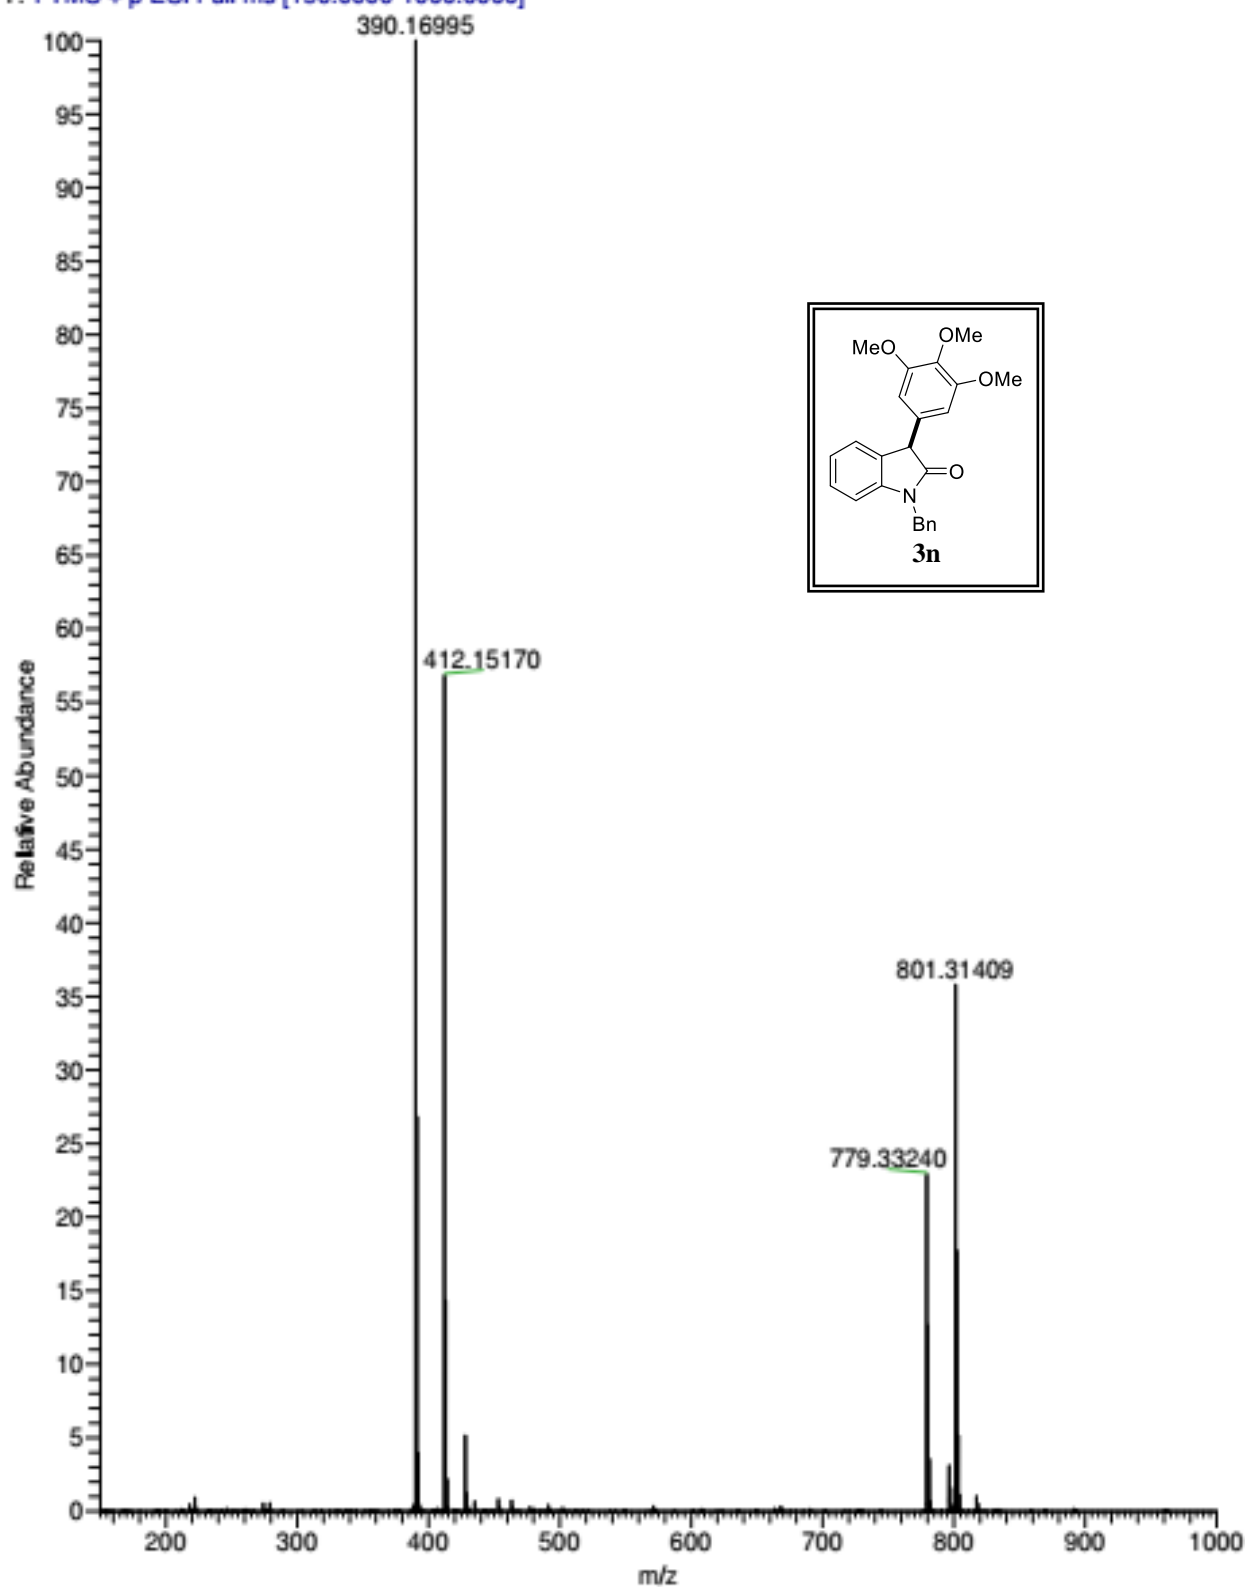

# Compound 3o

APR-620 #63 RT: 0.64 AV: 1 NL: 2.83E7  
T: FTMS + p ESI Full ms [100.0000-1000.0000]

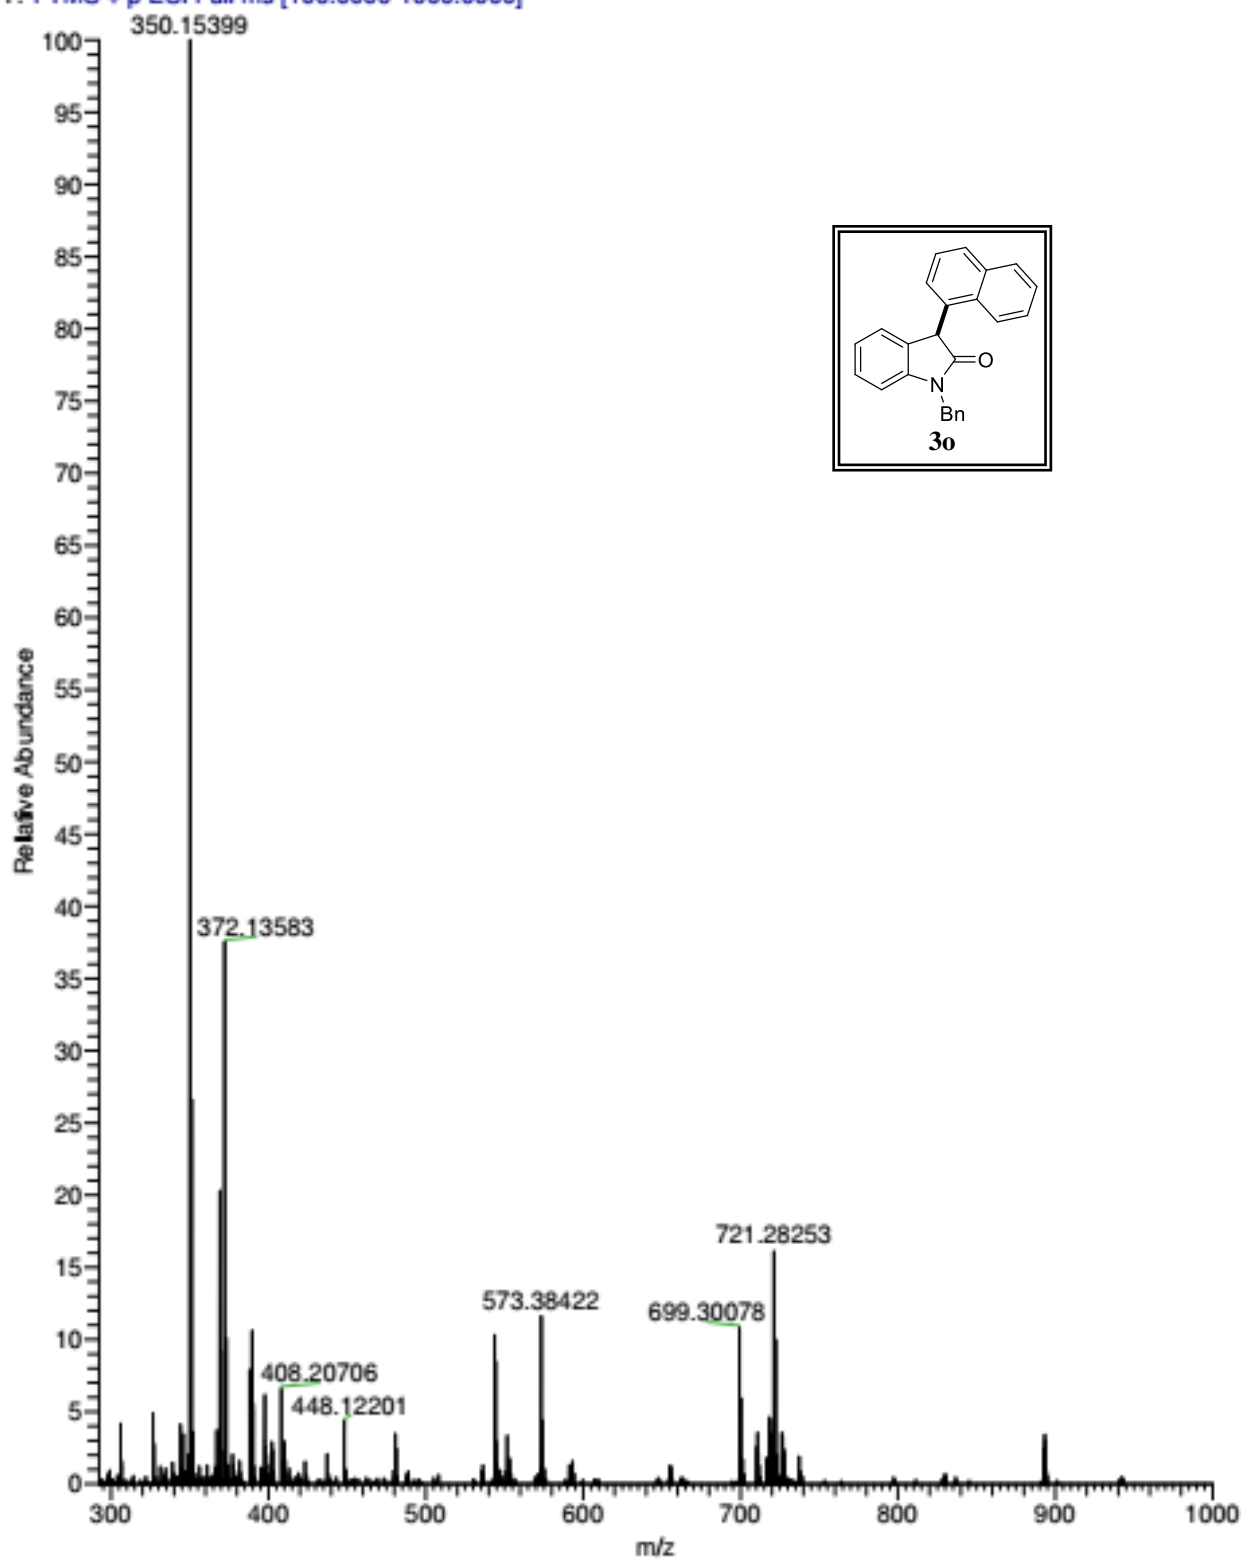



# Compound 3p

APR-819\_220211174005 #192 RT: 2.57 AV: 1 NL: 1.79E7

F: ITMS + c ESI Full ms[150.00-2000.00]

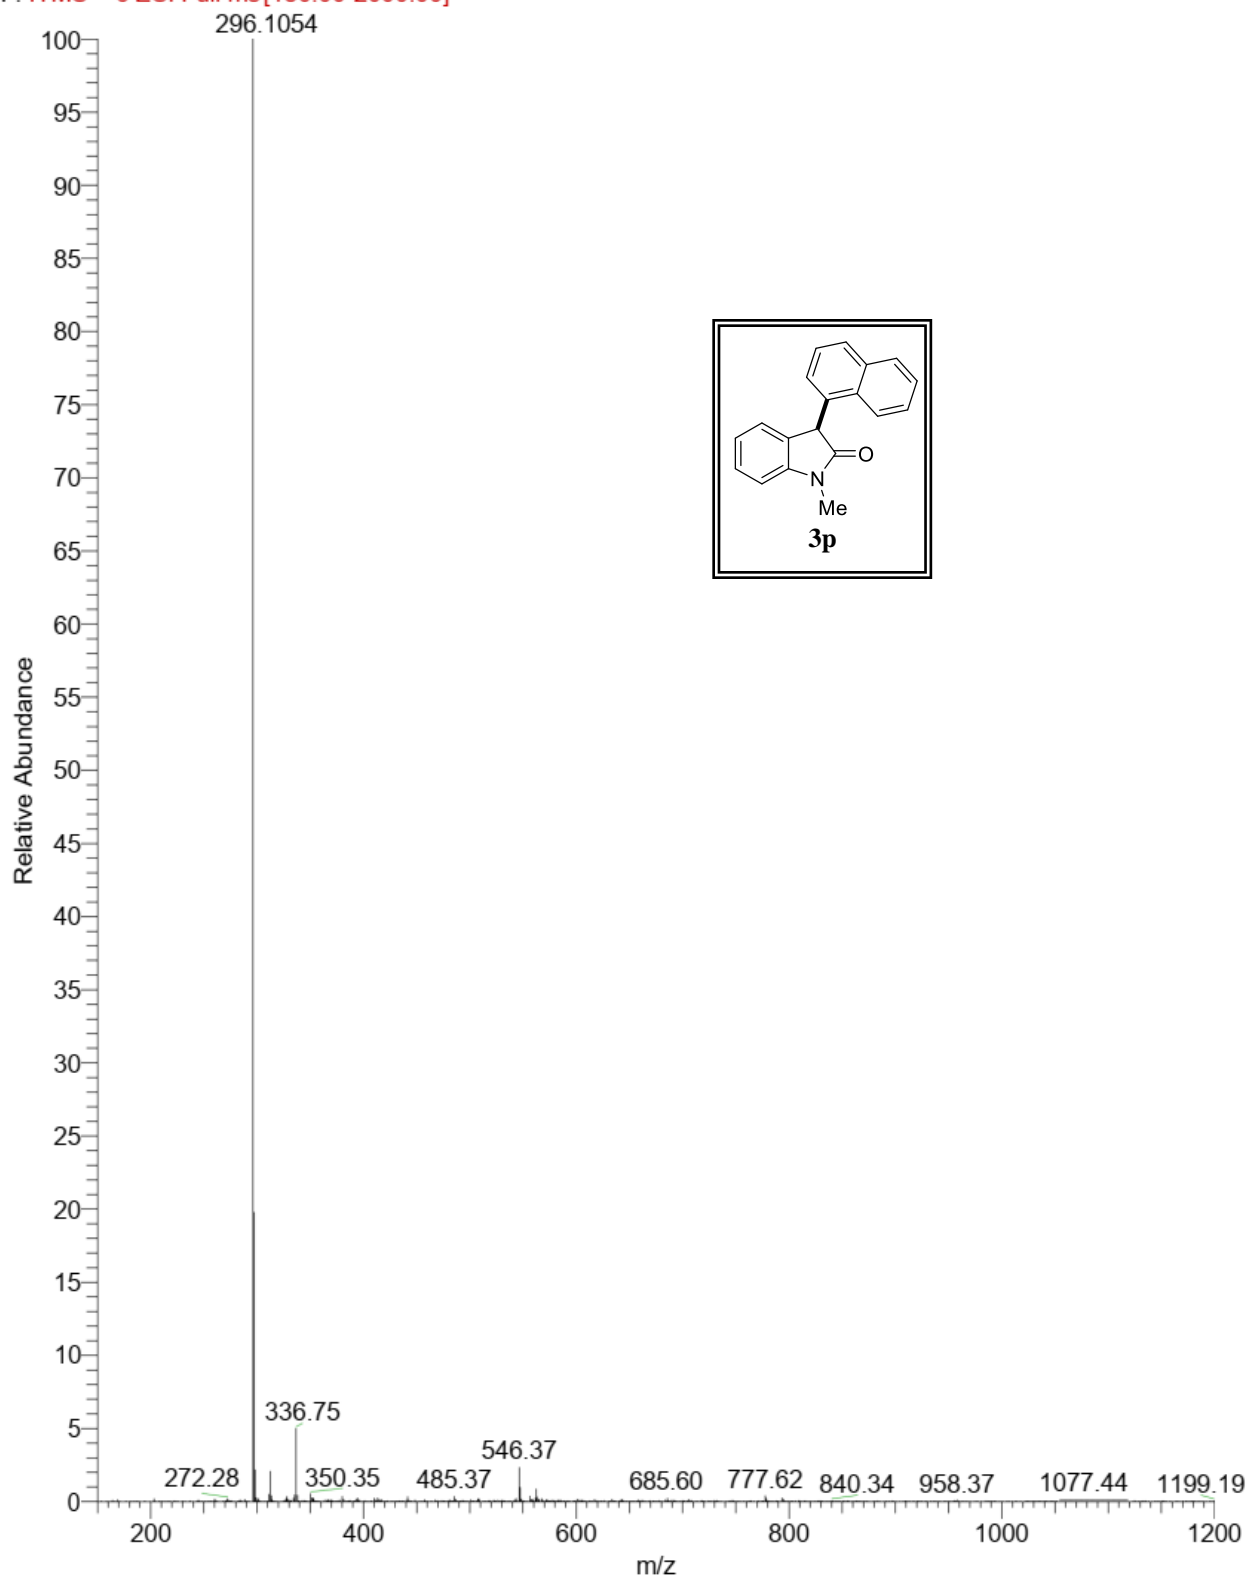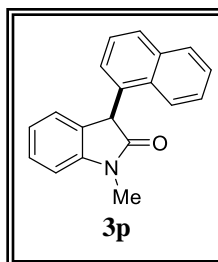

# Compound 3q

APR-704\_20210311133649 #58 RT: 0.56 AV: 1 NL: 2.17E8

T: FTMS + p ESI Full ms [133.4000-2000.0000]

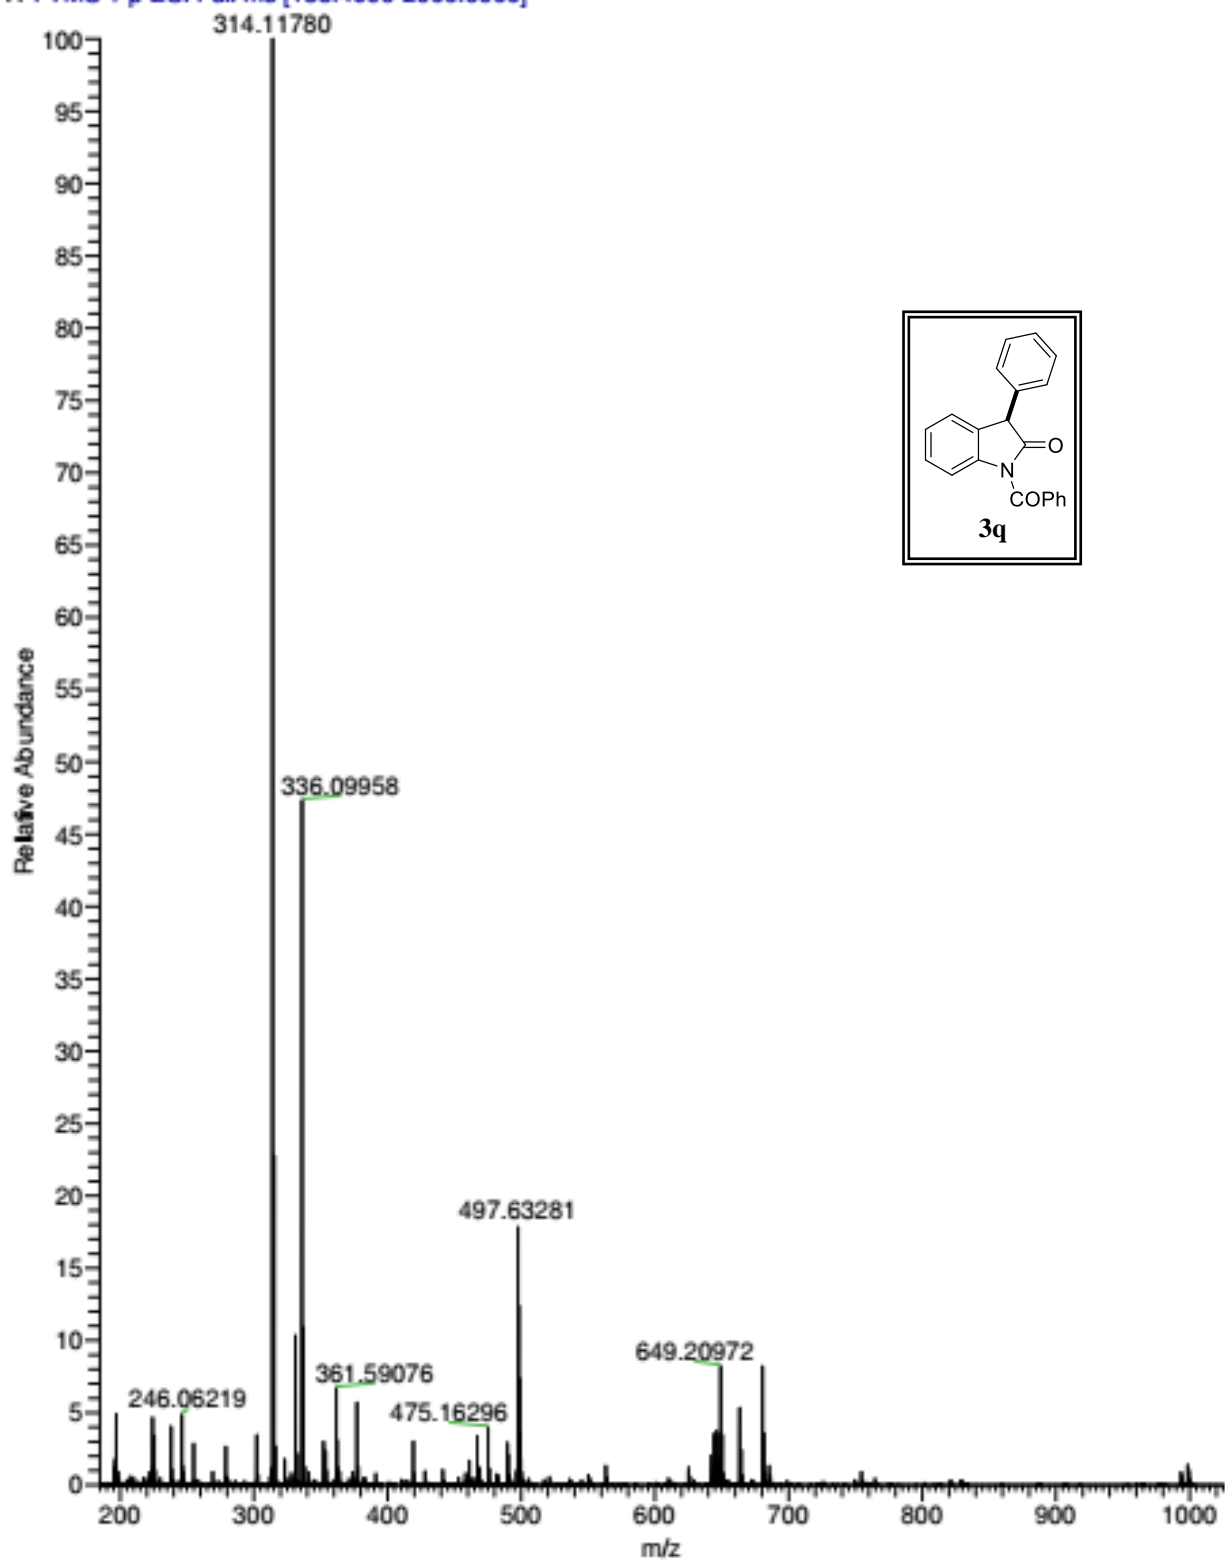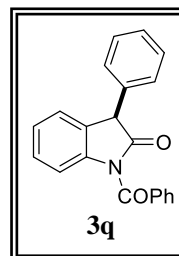

# Compound 3r

APR-440\_20201124140410 #47 RT: 0.51 AV: 1 NL: 1.15E8

T: FTMS + p ESI Full ms [100.0000-1000.0000]

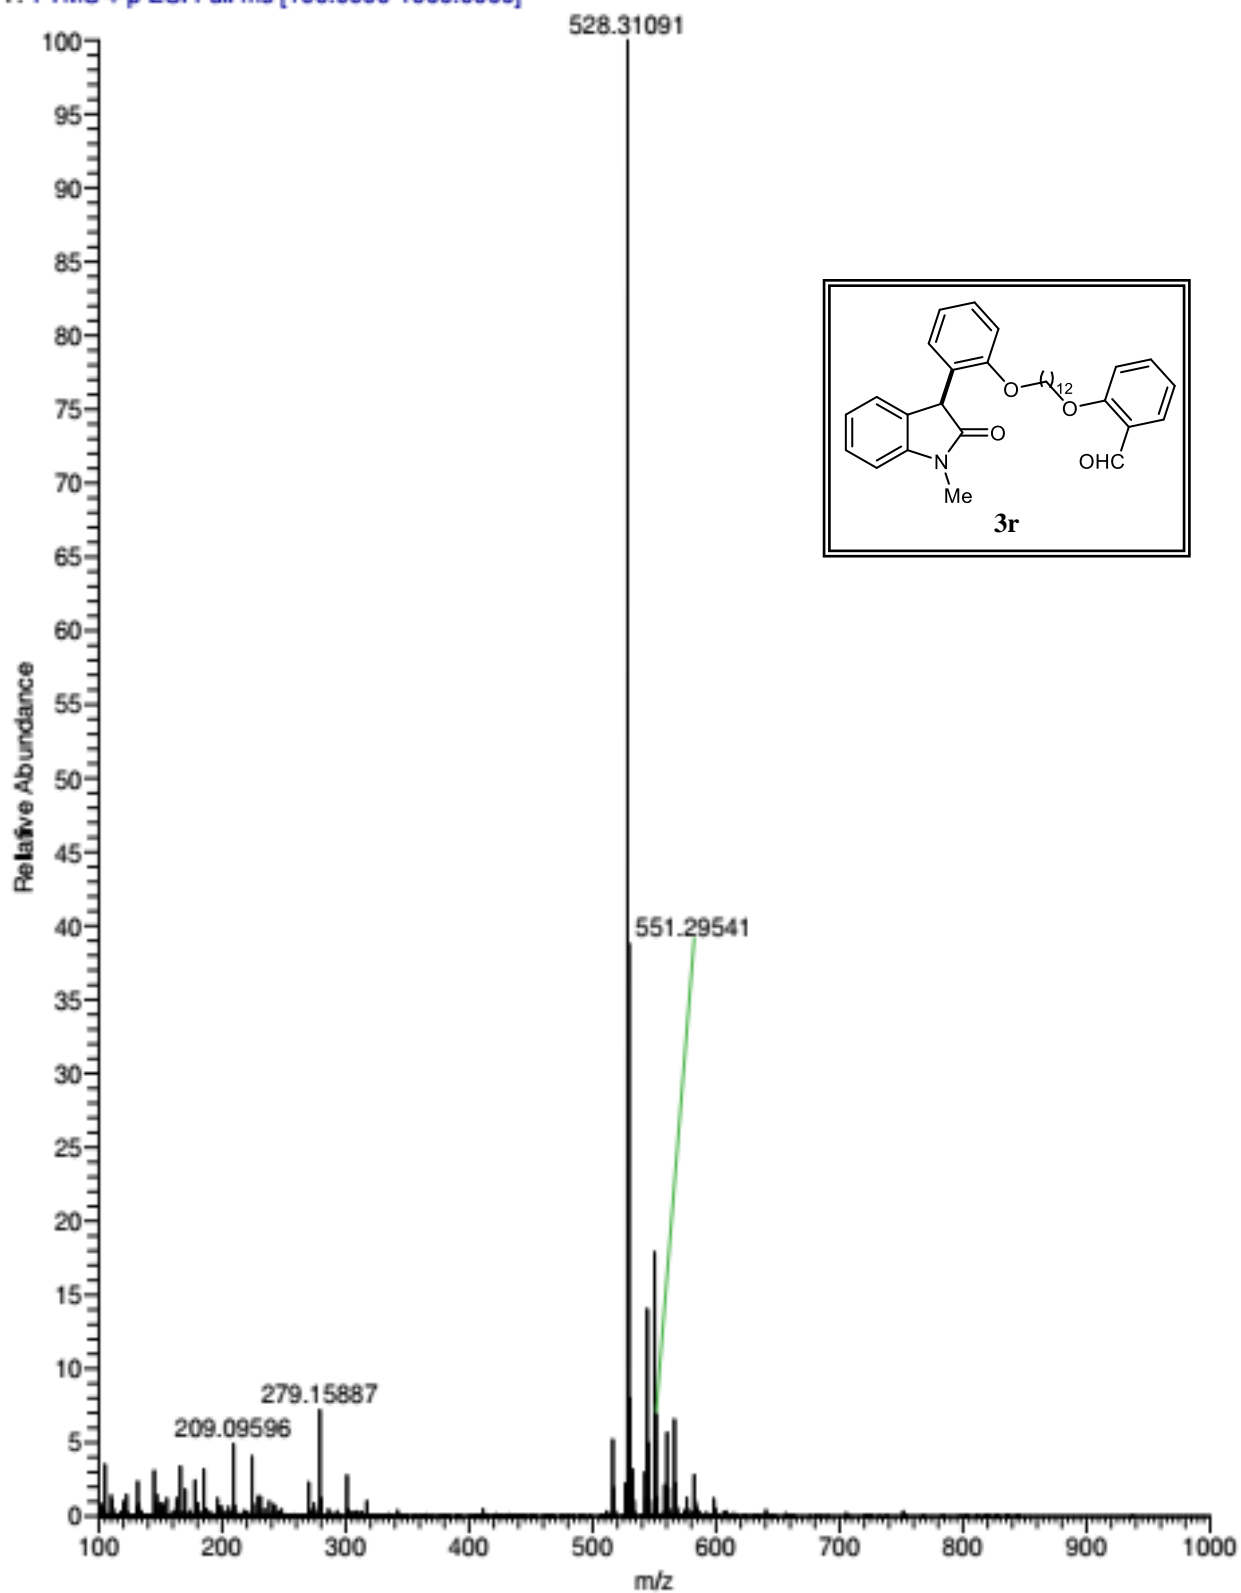

# Compound 3s

## Acquisition Parameter

|             |            |                      |          |                  |           |
|-------------|------------|----------------------|----------|------------------|-----------|
| Source Type | ESI        | Ion Polarity         | Positive | Set Nebulizer    | 0.3 Bar   |
| Focus       | Not active | Set Capillary        | 3000 V   | Set Dry Heater   | 180 °C    |
| Scan Begin  | 50 m/z     | Set End Plate Offset | -500 V   | Set Dry Gas      | 4.0 l/min |
| Scan End    | 2500 m/z   | Set Charging Voltage | 0 V      | Set Divert Valve | Waste     |
|             |            | Set Corona           | 0 nA     | Set APCI Heater  | 0 °C      |

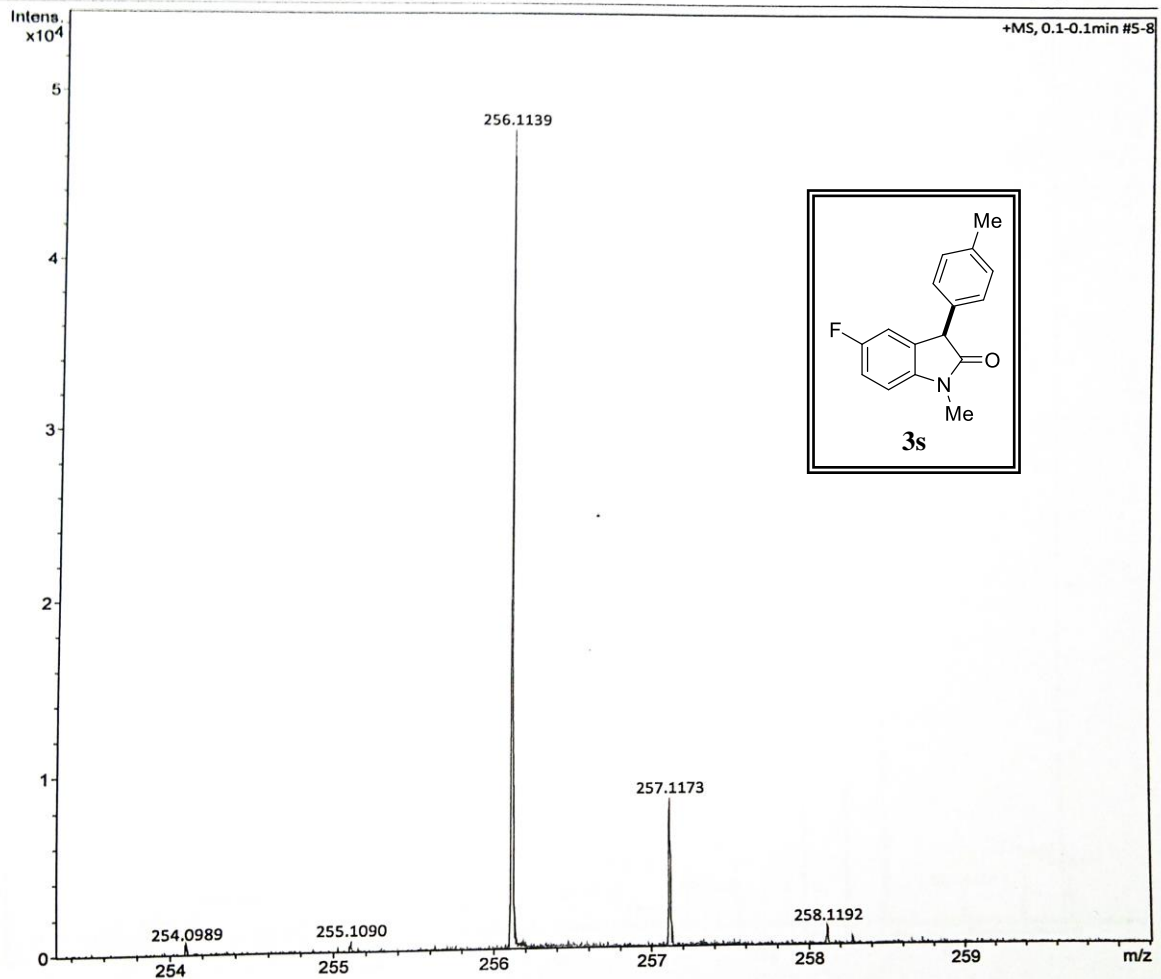

# Compound 3t

## Acquisition Parameter

|             |            |                      |          |                  |           |
|-------------|------------|----------------------|----------|------------------|-----------|
| Source Type | ESI        | Ion Polarity         | Positive | Set Nebulizer    | 0.3 Bar   |
| Focus       | Not active | Set Capillary        | 3000 V   | Set Dry Heater   | 180 °C    |
| Scan Begin  | 50 m/z     | Set End Plate Offset | -500 V   | Set Dry Gas      | 4.0 l/min |
| Scan End    | 1500 m/z   | Set Charging Voltage | 0 V      | Set Divert Valve | Waste     |
|             |            | Set Corona           | 0 nA     | Set APCI Heater  | 0 °C      |

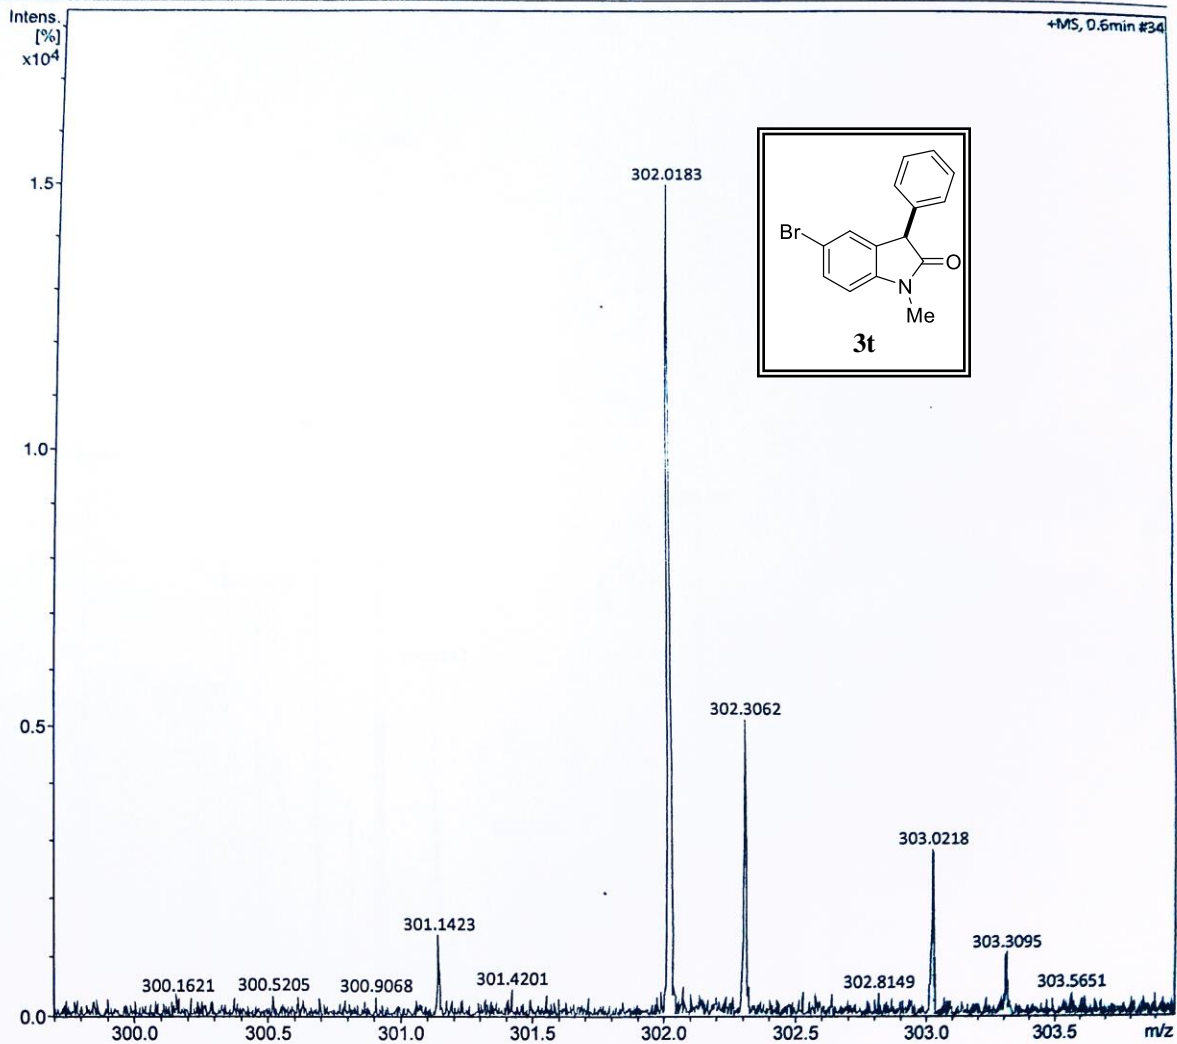

# Compound 3u

## Acquisition Parameter

|             |            |                      |          |                  |           |
|-------------|------------|----------------------|----------|------------------|-----------|
| Source Type | ESI        | Ion Polarity         | Positive | Set Nebulizer    | 0.3 Bar   |
| Focus       | Not active | Set Capillary        | 4500 V   | Set Dry Heater   | 120 °C    |
| Scan Begin  | 50 m/z     | Set End Plate Offset | -500 V   | Set Dry Gas      | 4.0 l/min |
| Scan End    | 1500 m/z   | Set Charging Voltage | 0 V      | Set Divert Valve | Waste     |
|             |            | Set Corona           | 0 nA     | Set APCI Heater  | 0 °C      |

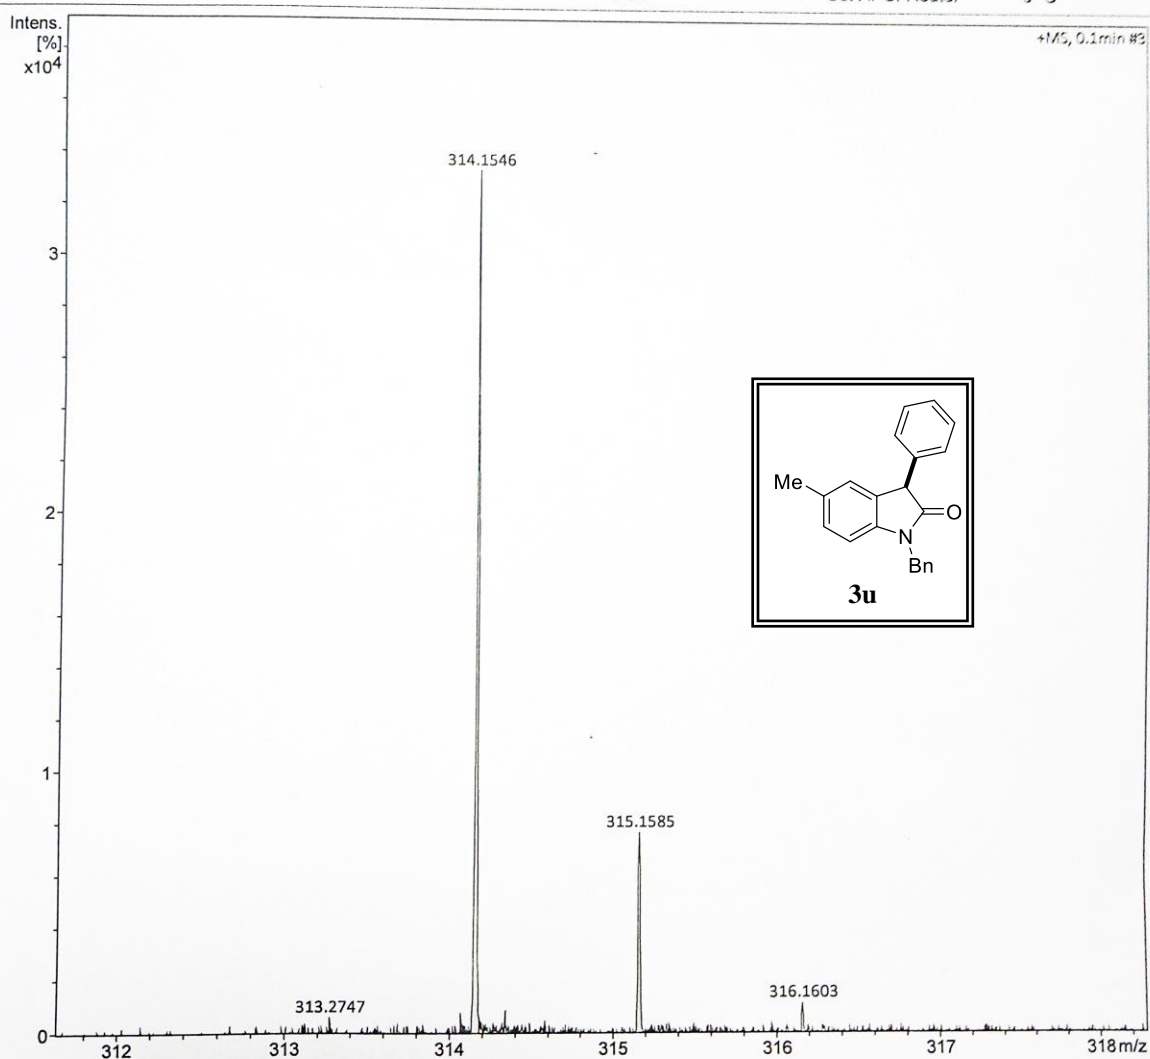

# Compound 3v

APR-785\_20201124135639 #39 RT: 0.43 AV: 1 NL: 8.14E7  
T: FTMS + p ESI Full ms [100.0000-1000.0000]

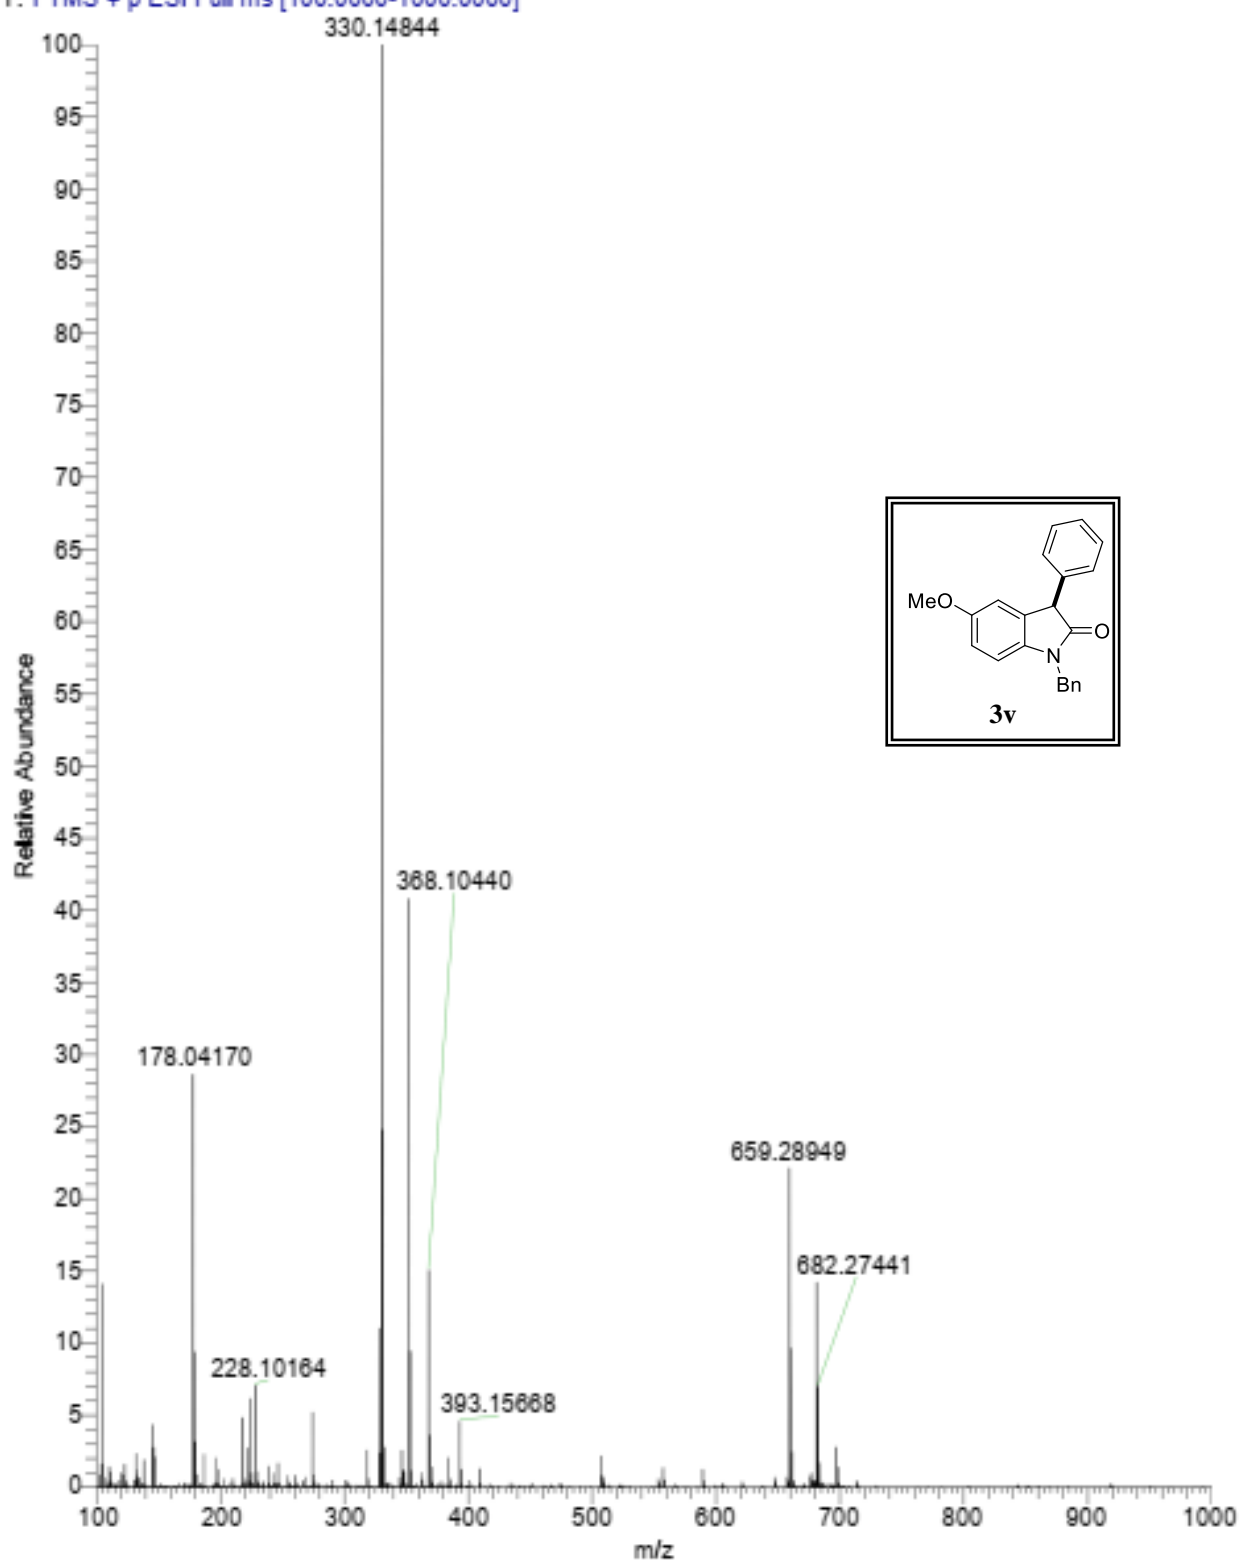

# Compound 3w

APR-426\_20190702174234 #97 RT: 1.00 AV: 1 NL: 1.28E7

T: FTMS + p ESI Full ms [150.0000-1000.0000]

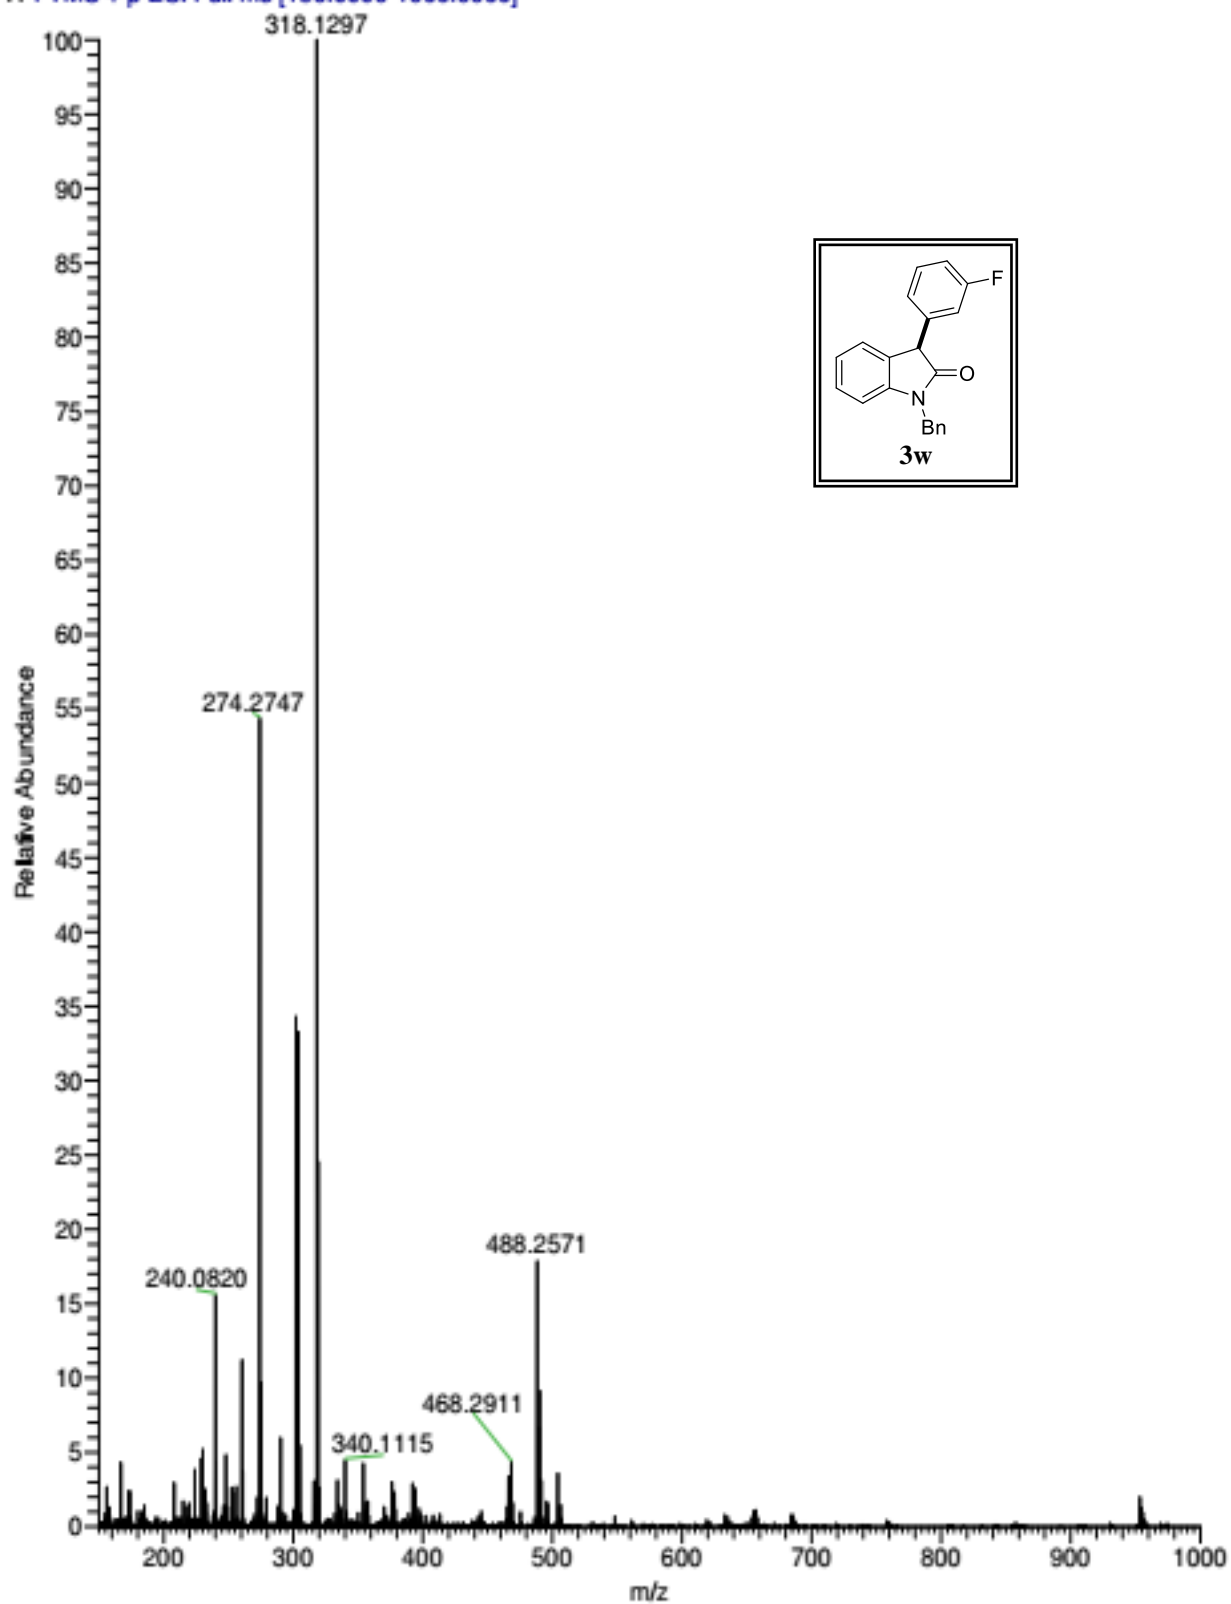



# Compound 3x

APR-527 #49 RT: 0.48 AV: 1 NL: 3.81E7  
T: FTMS + p ESI Full ms [100.0000-1000.0000]

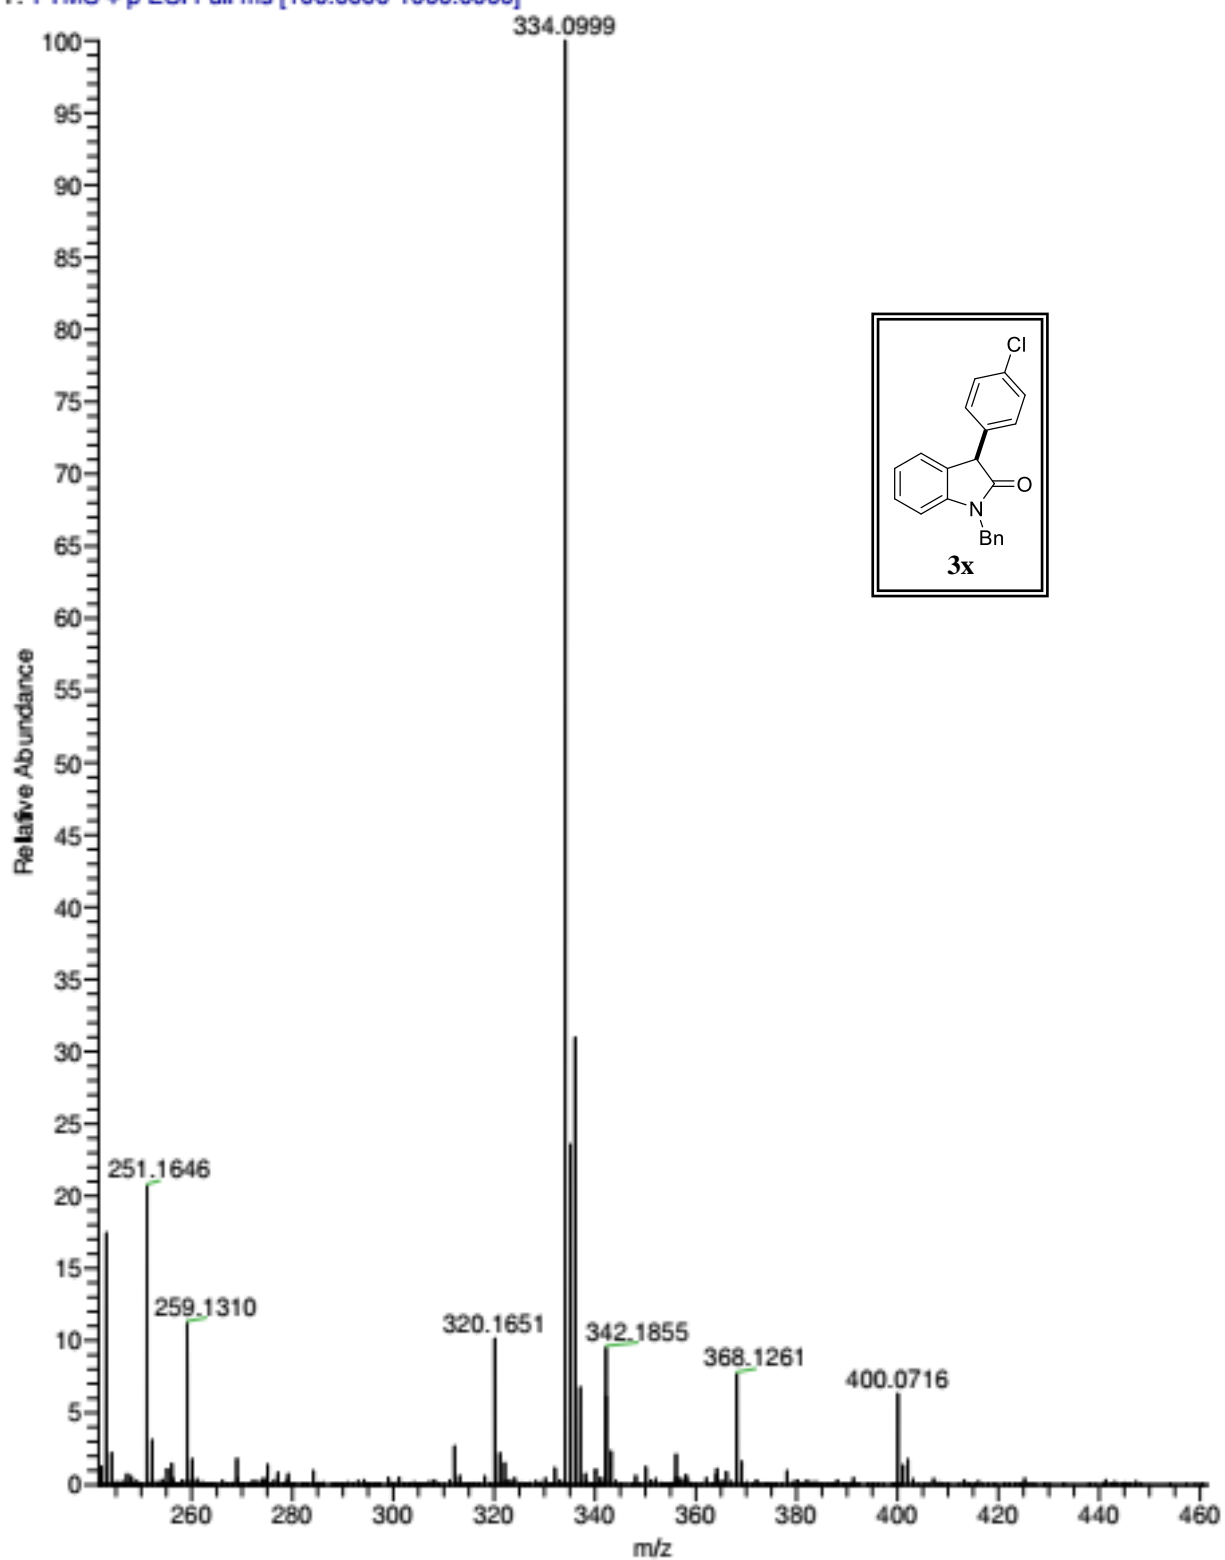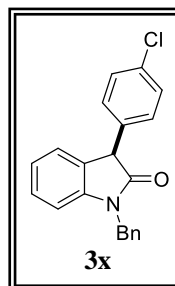

# Compound 3y

APR-425\_20190702173945 #47 RT: 0.49 AV: 1 NL: 1.88E8

T: FTMS + p ESI Full ms [150.0000-1000.0000]

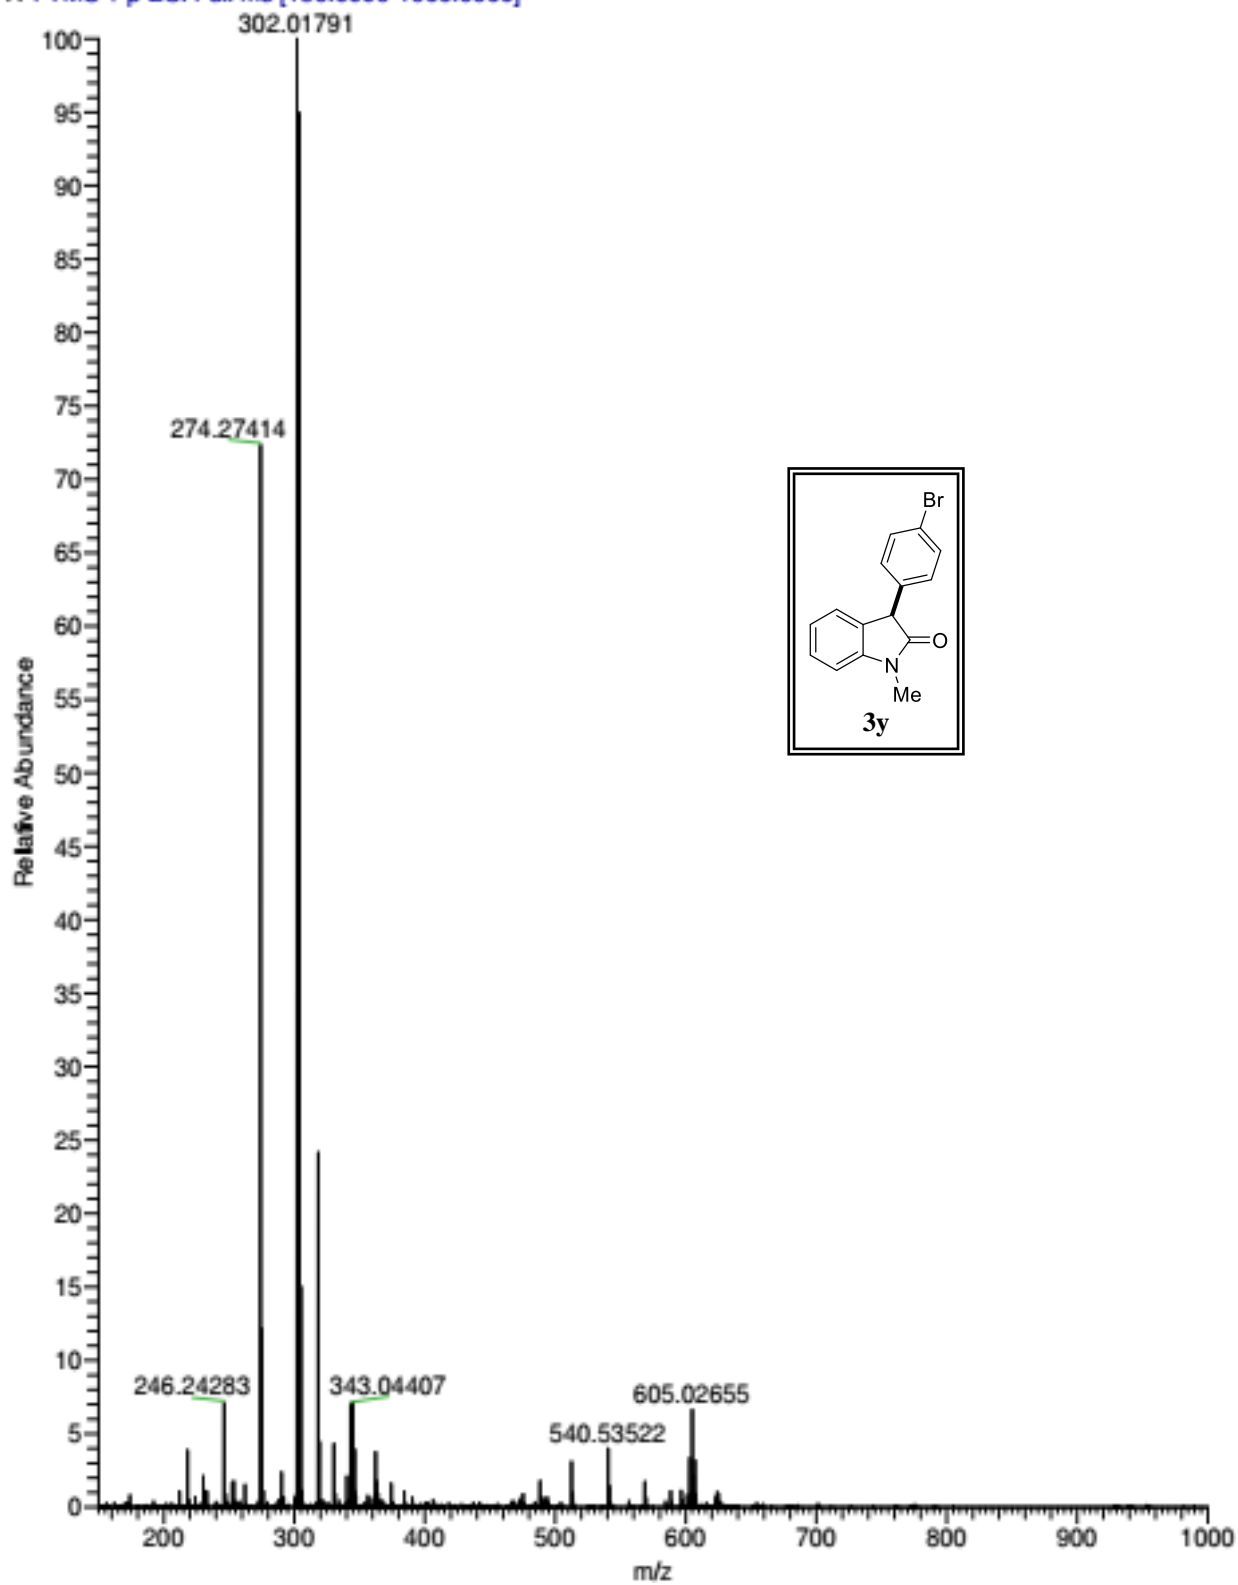

# Compound 3z

APR-435 #55 RT: 0.53 AV: 1 NL: 1.78E8  
T: FTMS + p ESI Full ms [100.0000-1000.0000]

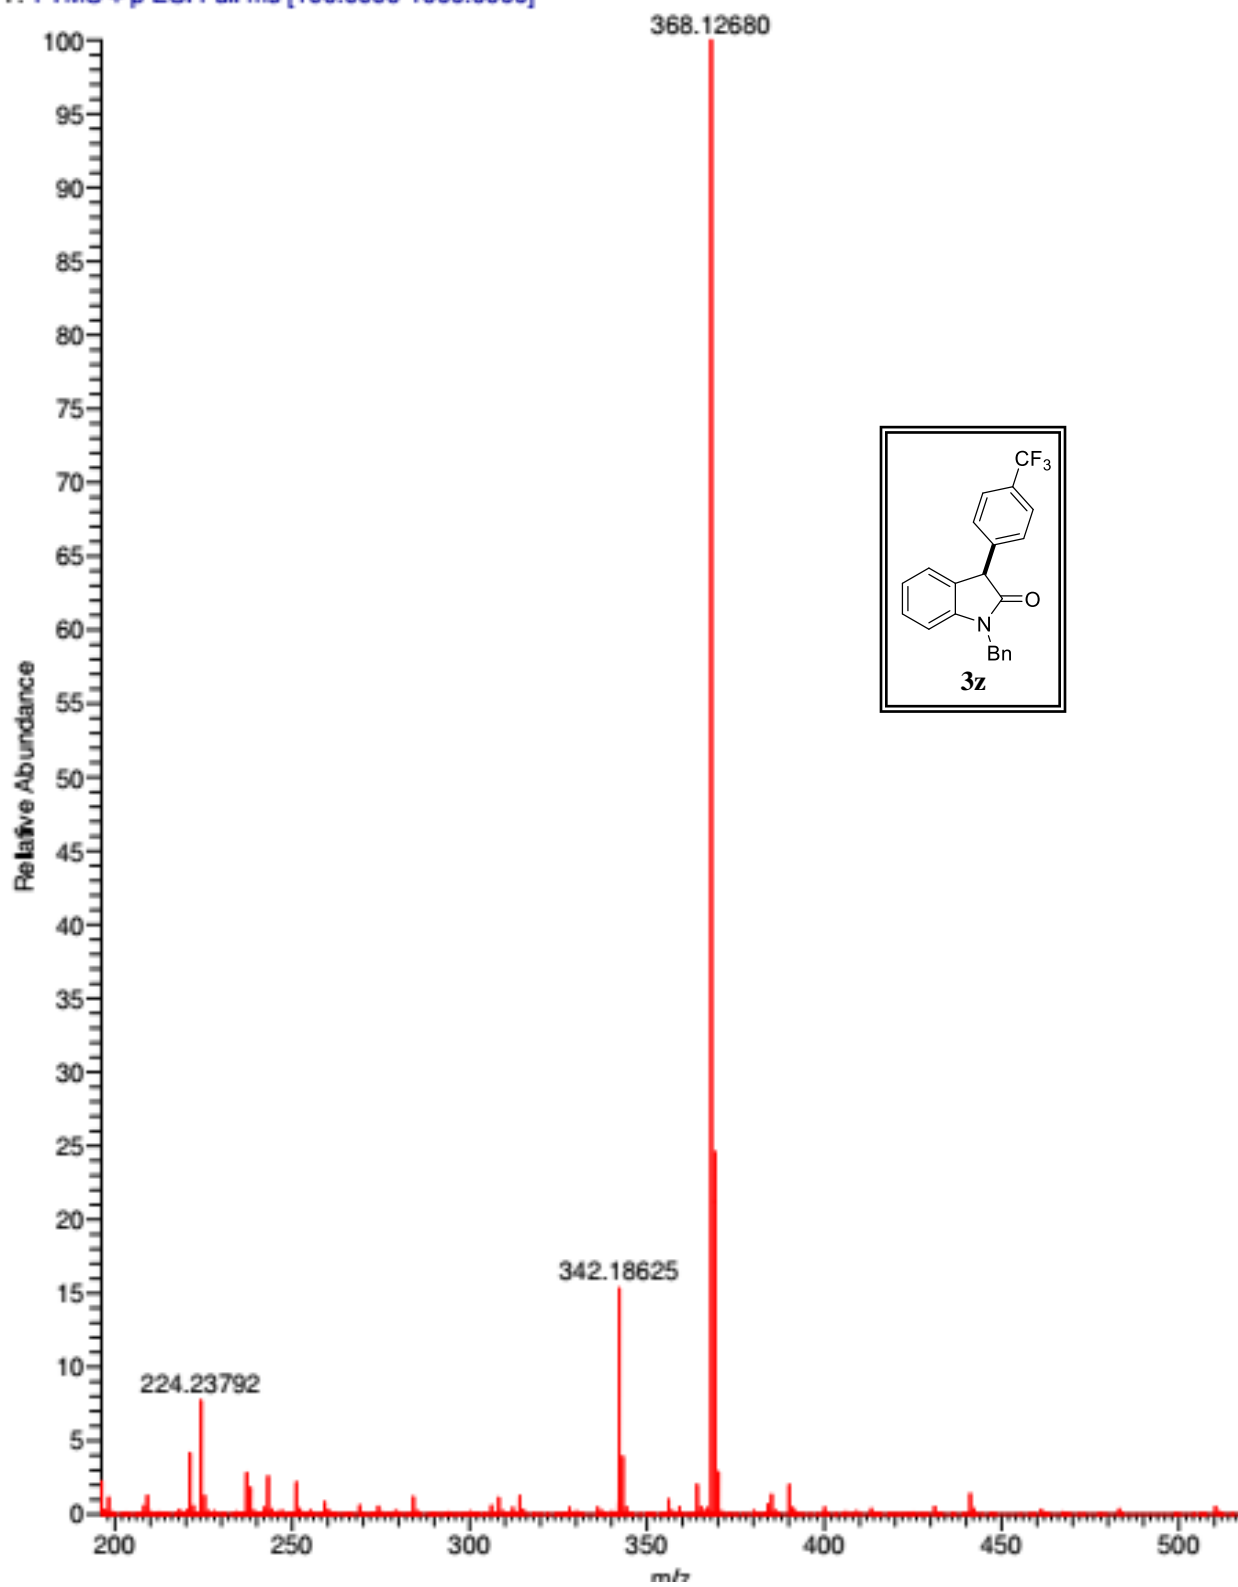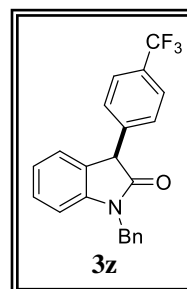

# Compound 3aa

APR-427\_20190702174519 #34 RT: 0.36 AV: 1 NL: 1.11E9

T: FTMS - p ESI Full ms [150.0000-1000.0000]

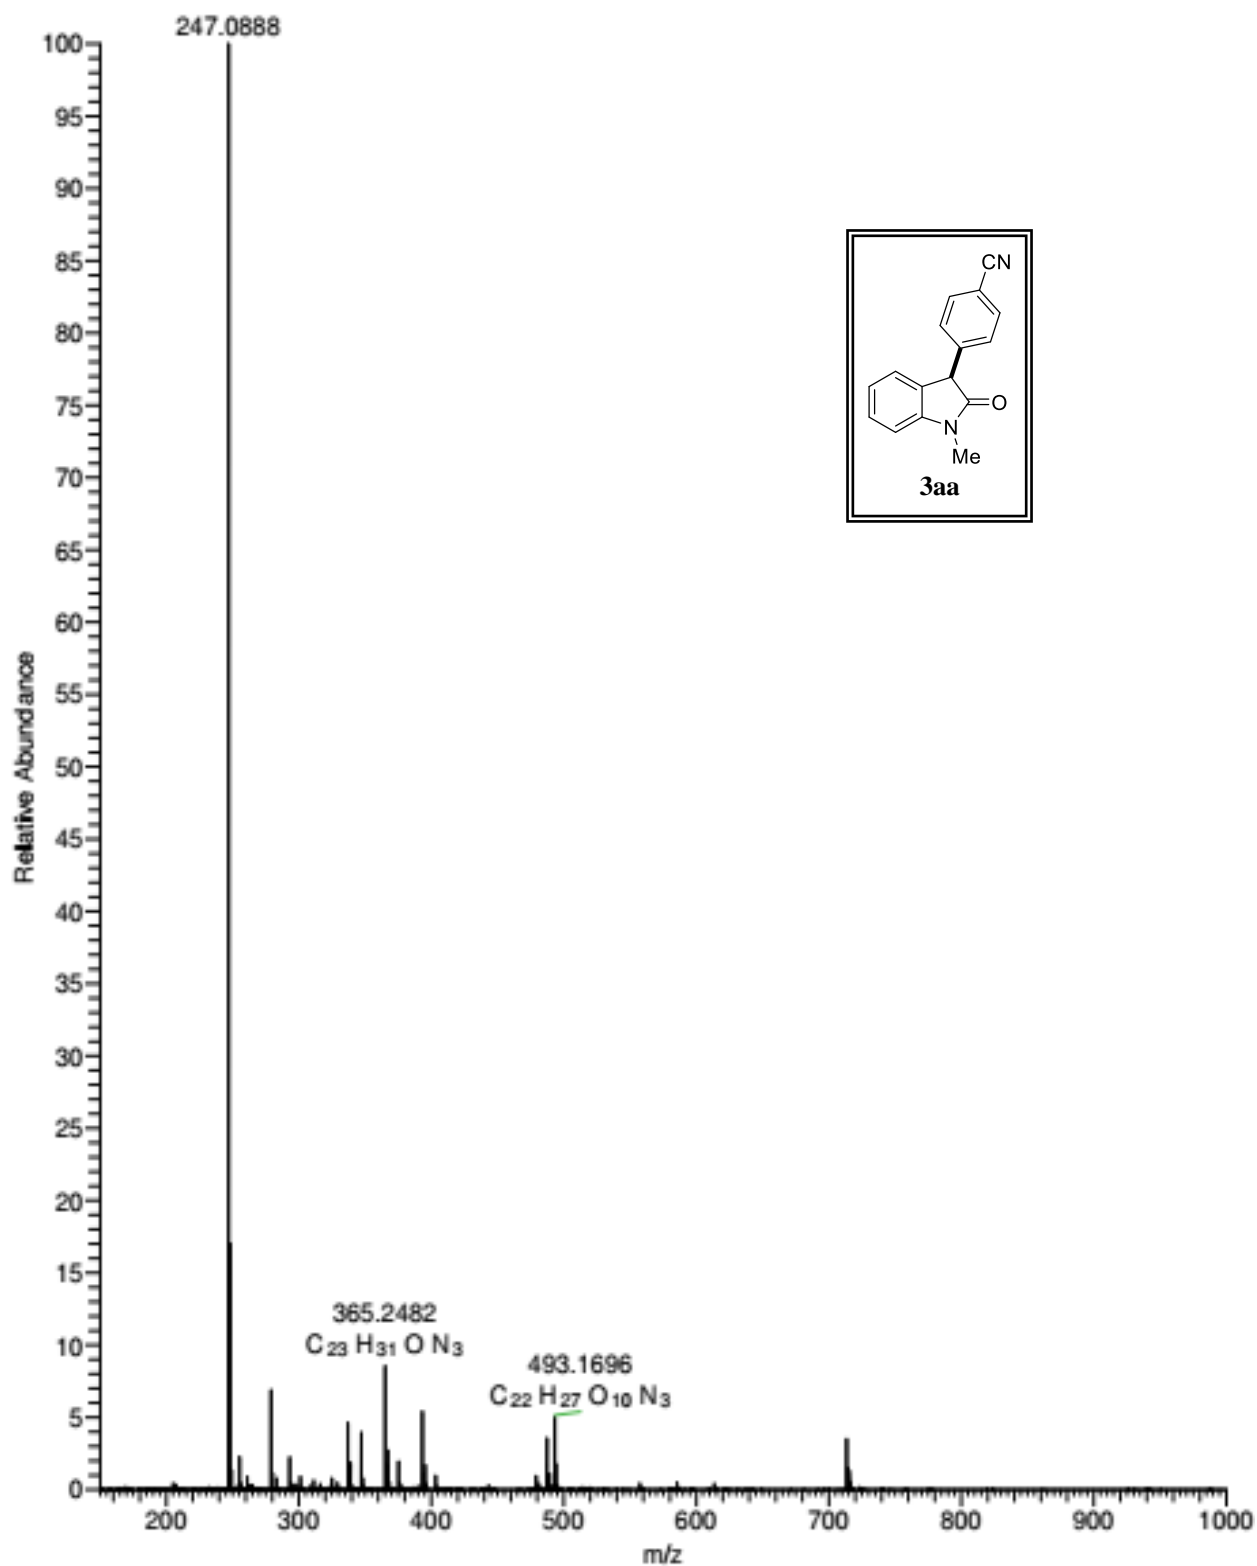

# Compound 3ab

APR-832 20210509111039 #28 RT: 0.27 AV: 1 NL: 1.24E7  
T: FTMS + p ESI Full ms [133.4000-2000.0000]

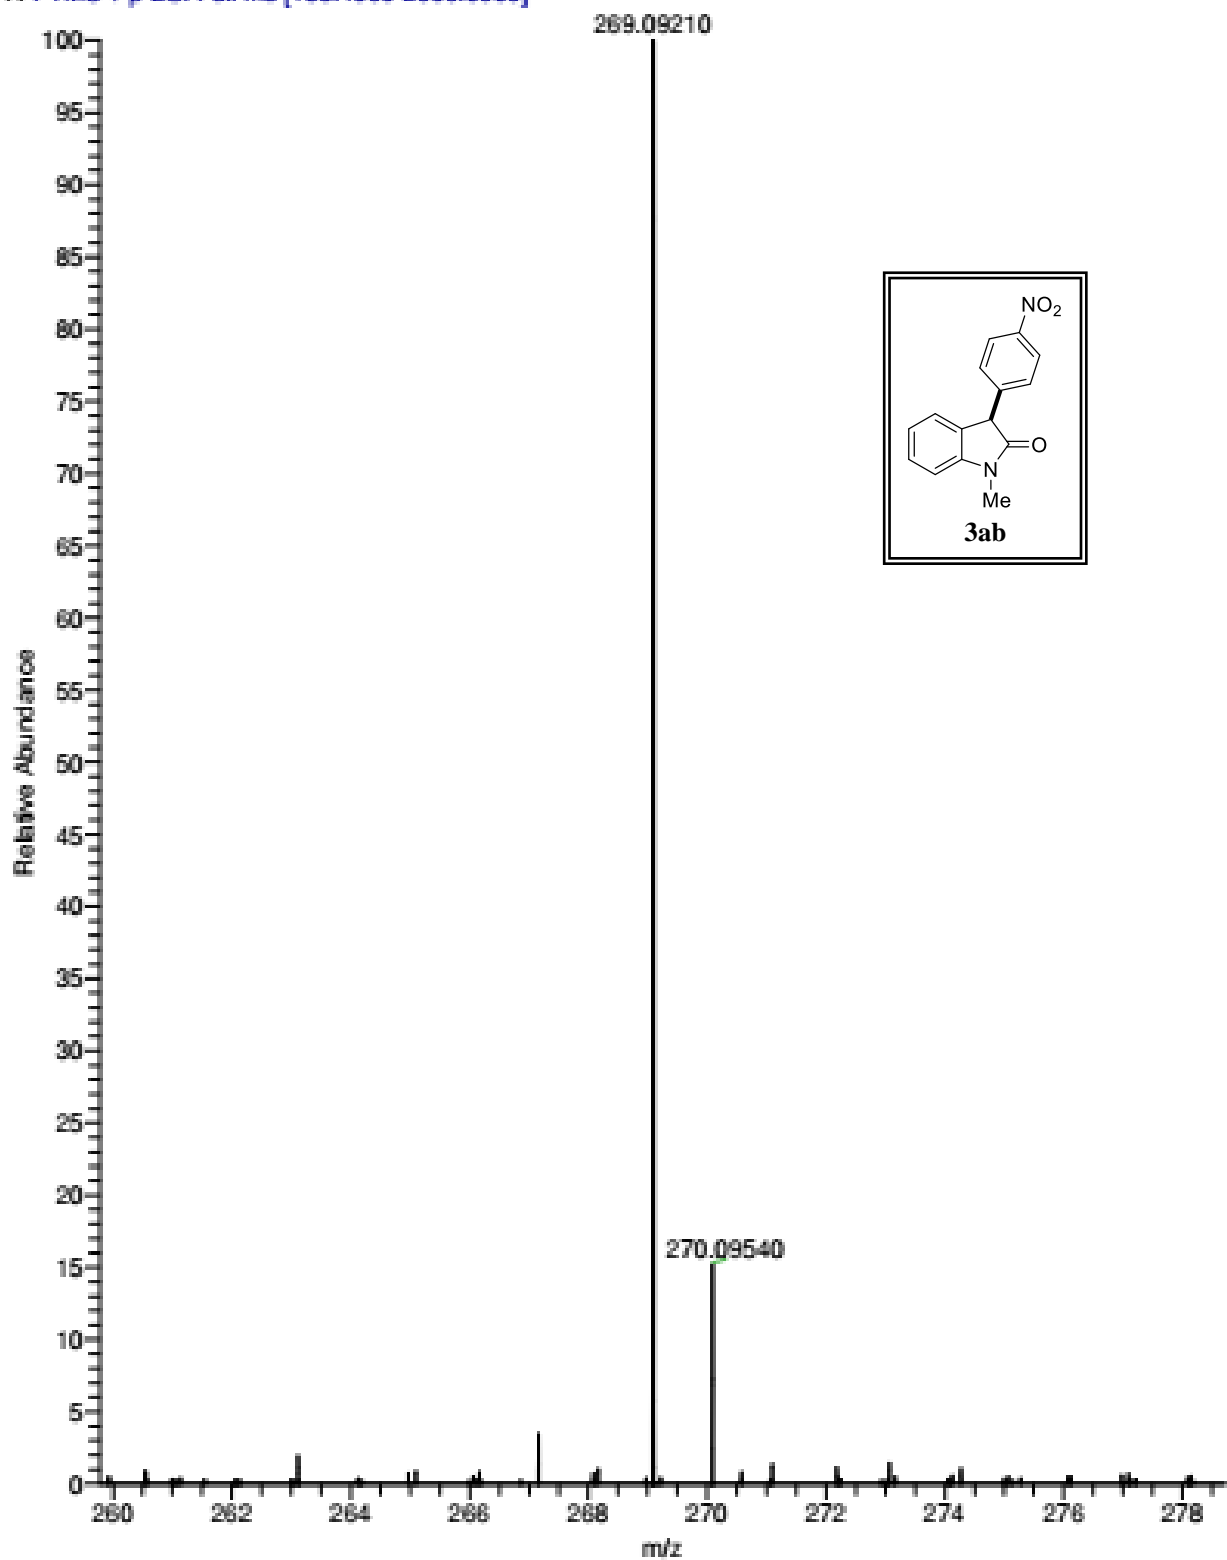

# Compound 3ac

APR-636 #48 RT: 0.47 AV: 1 NL: 7.16E7  
T: FTMS + p ESI Full ms [133.4000-2000.0000]

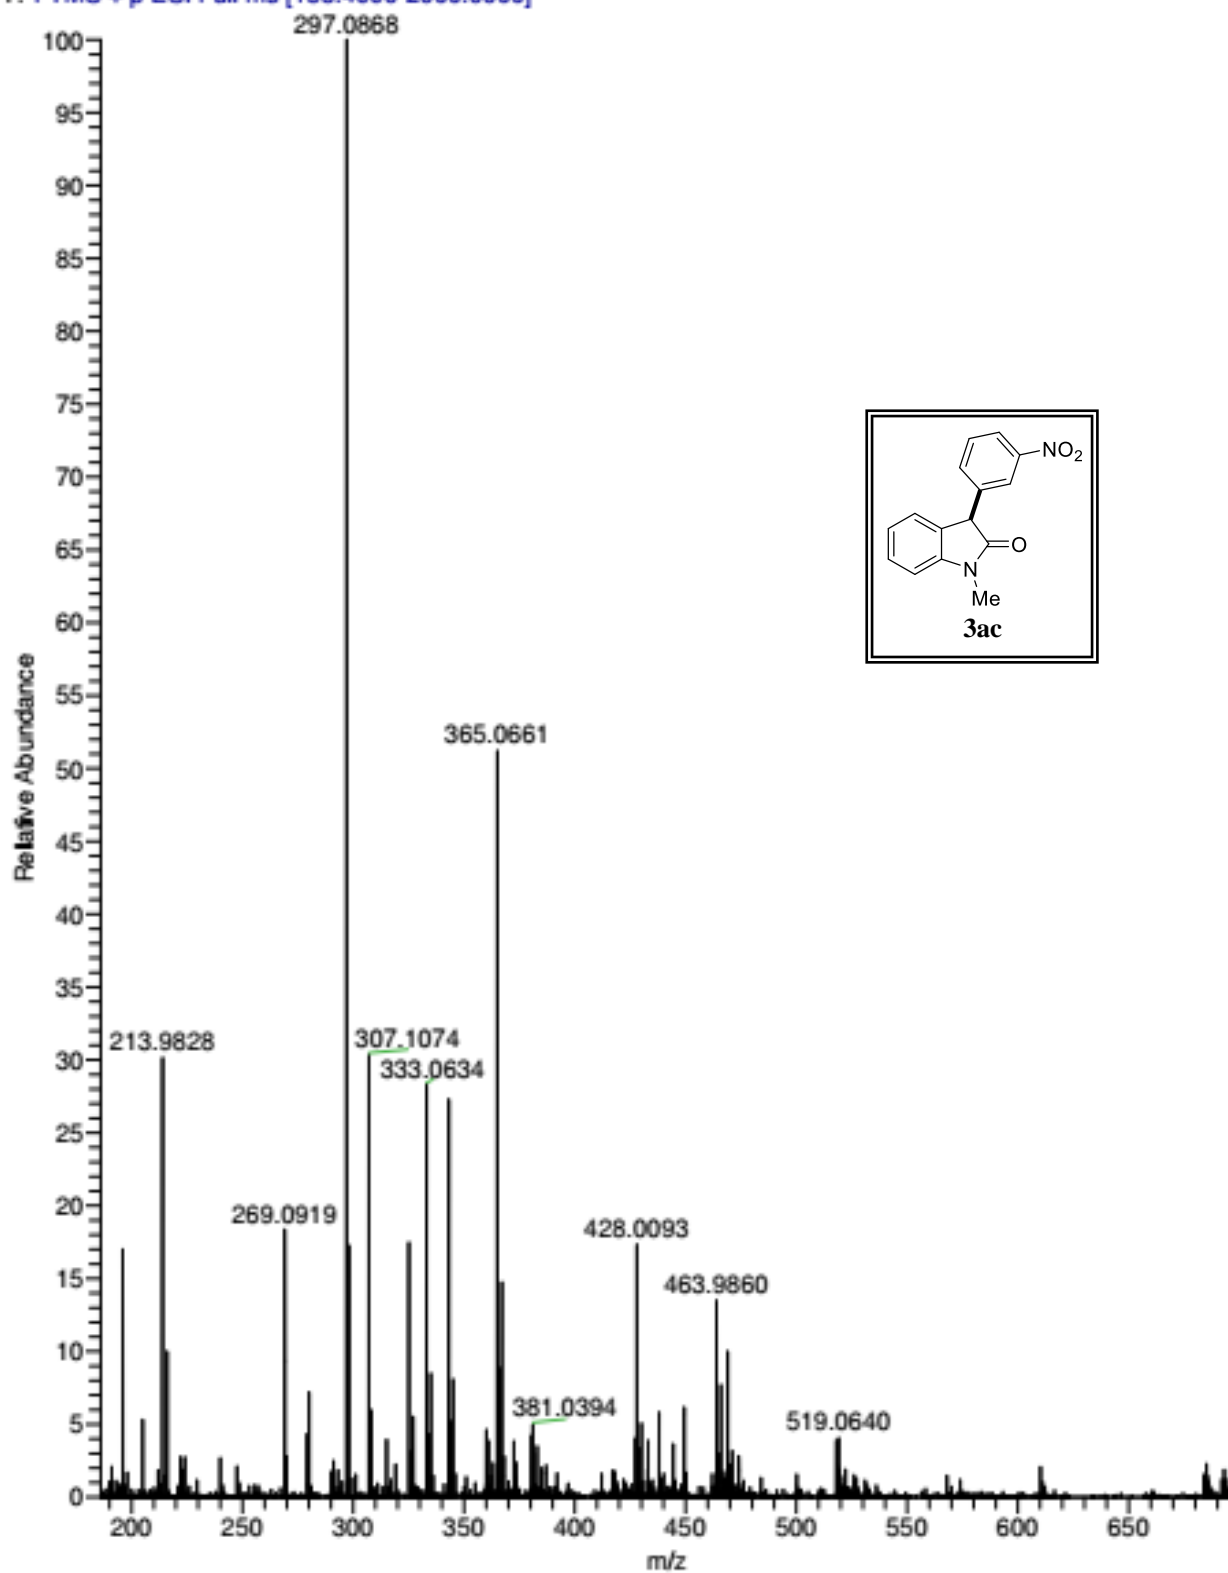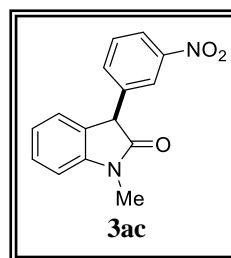

# Compound 6a

APR-612\_20210509110611 #83 RT: 0.81 AV: 1 NL: 6.80E6

T: FTMS + p ESI Full ms [133.4000-2000.0000]

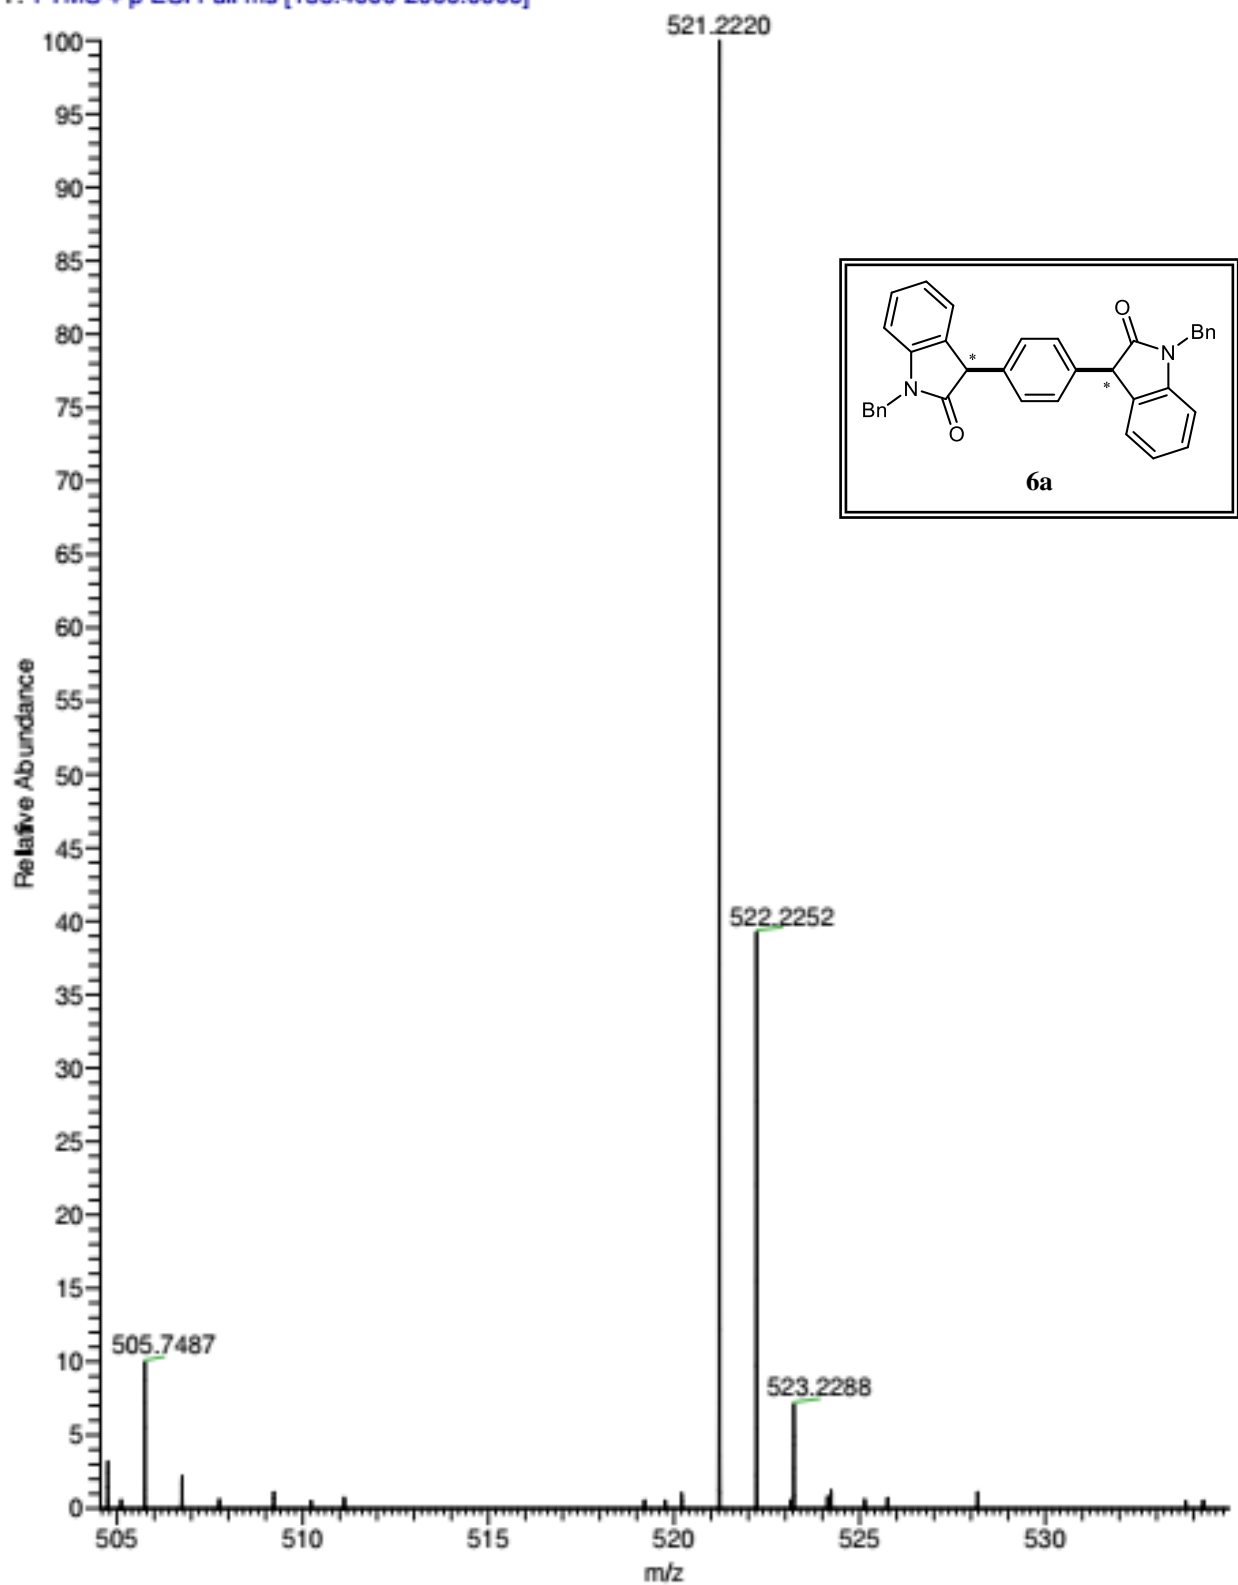

# Compound **6b**

APR-684 #49 RT: 0.49 AV: 1 NL: 3.99E7  
T: FTMS + p ESI Full ms [100.0000-1000.0000]

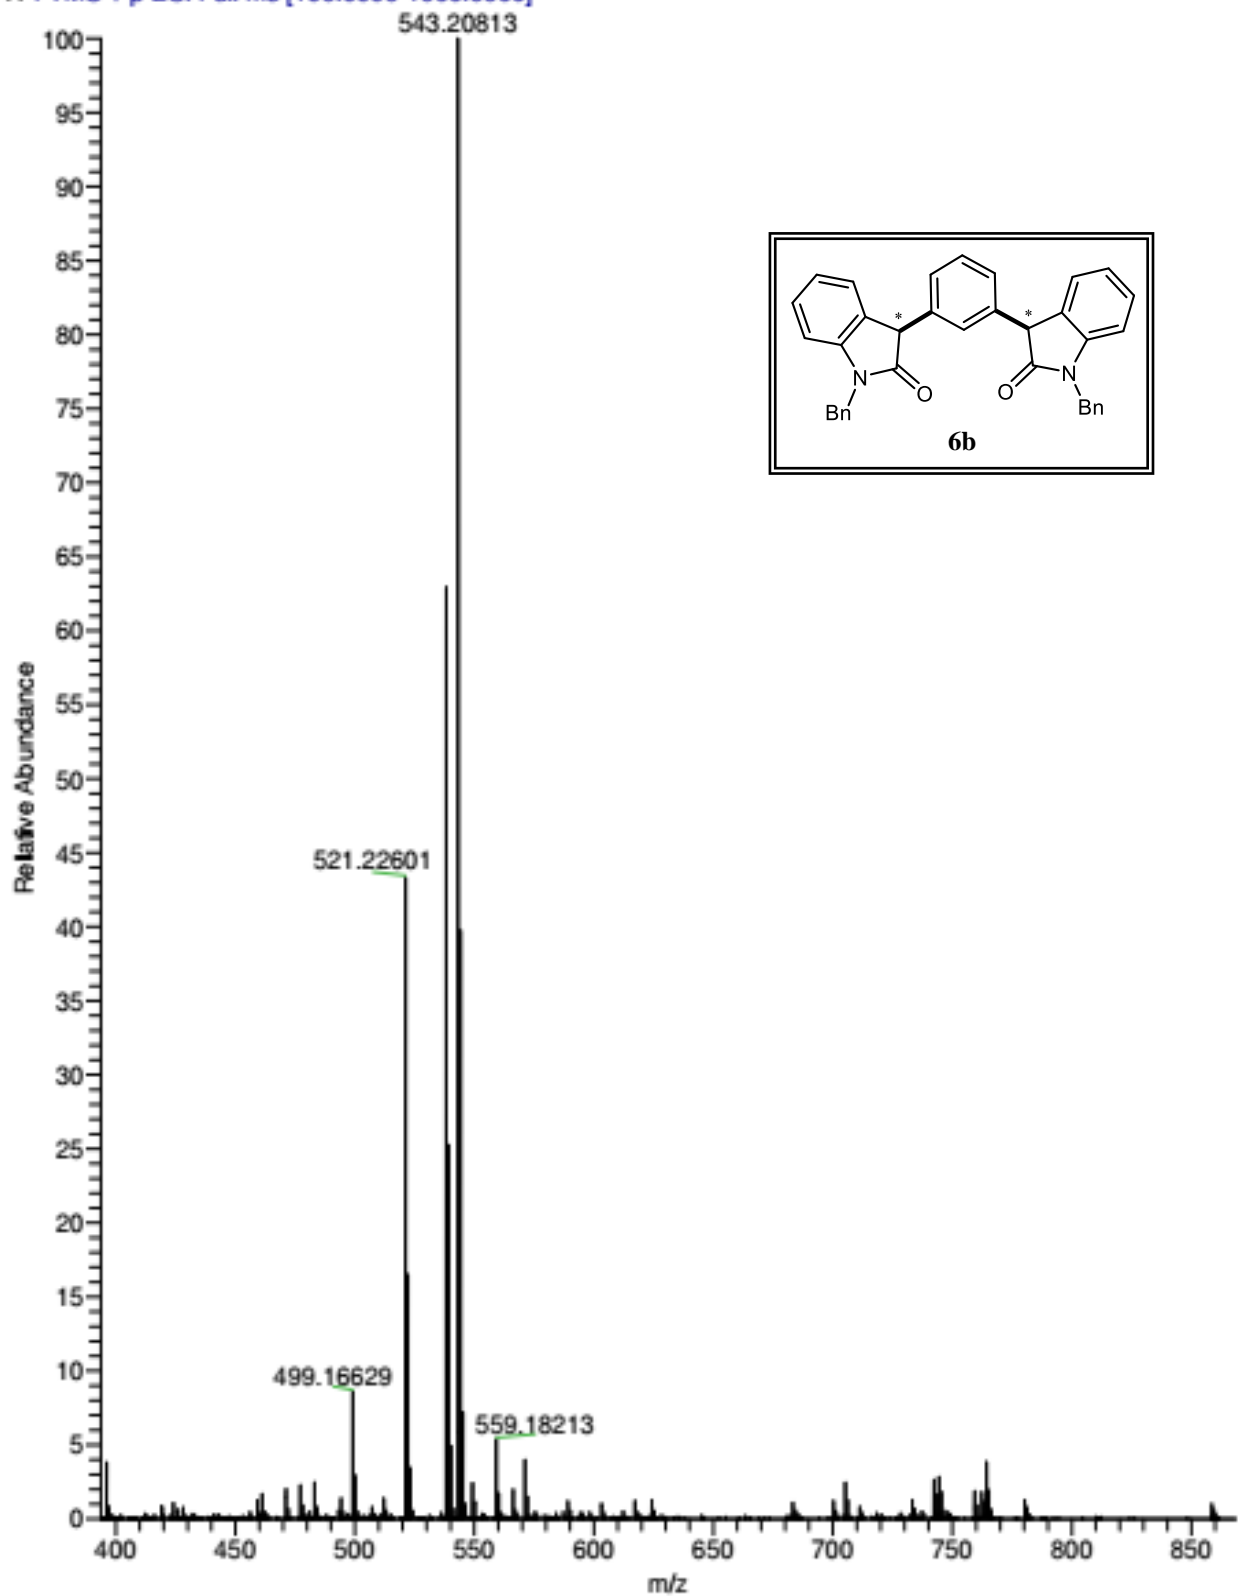



# Compound 7a

APR-705 #64 RT: 0.63 AV: 1 NL: 4.73E6  
T: FTMS + p ESI Full ms [133.4000-2000.0000]

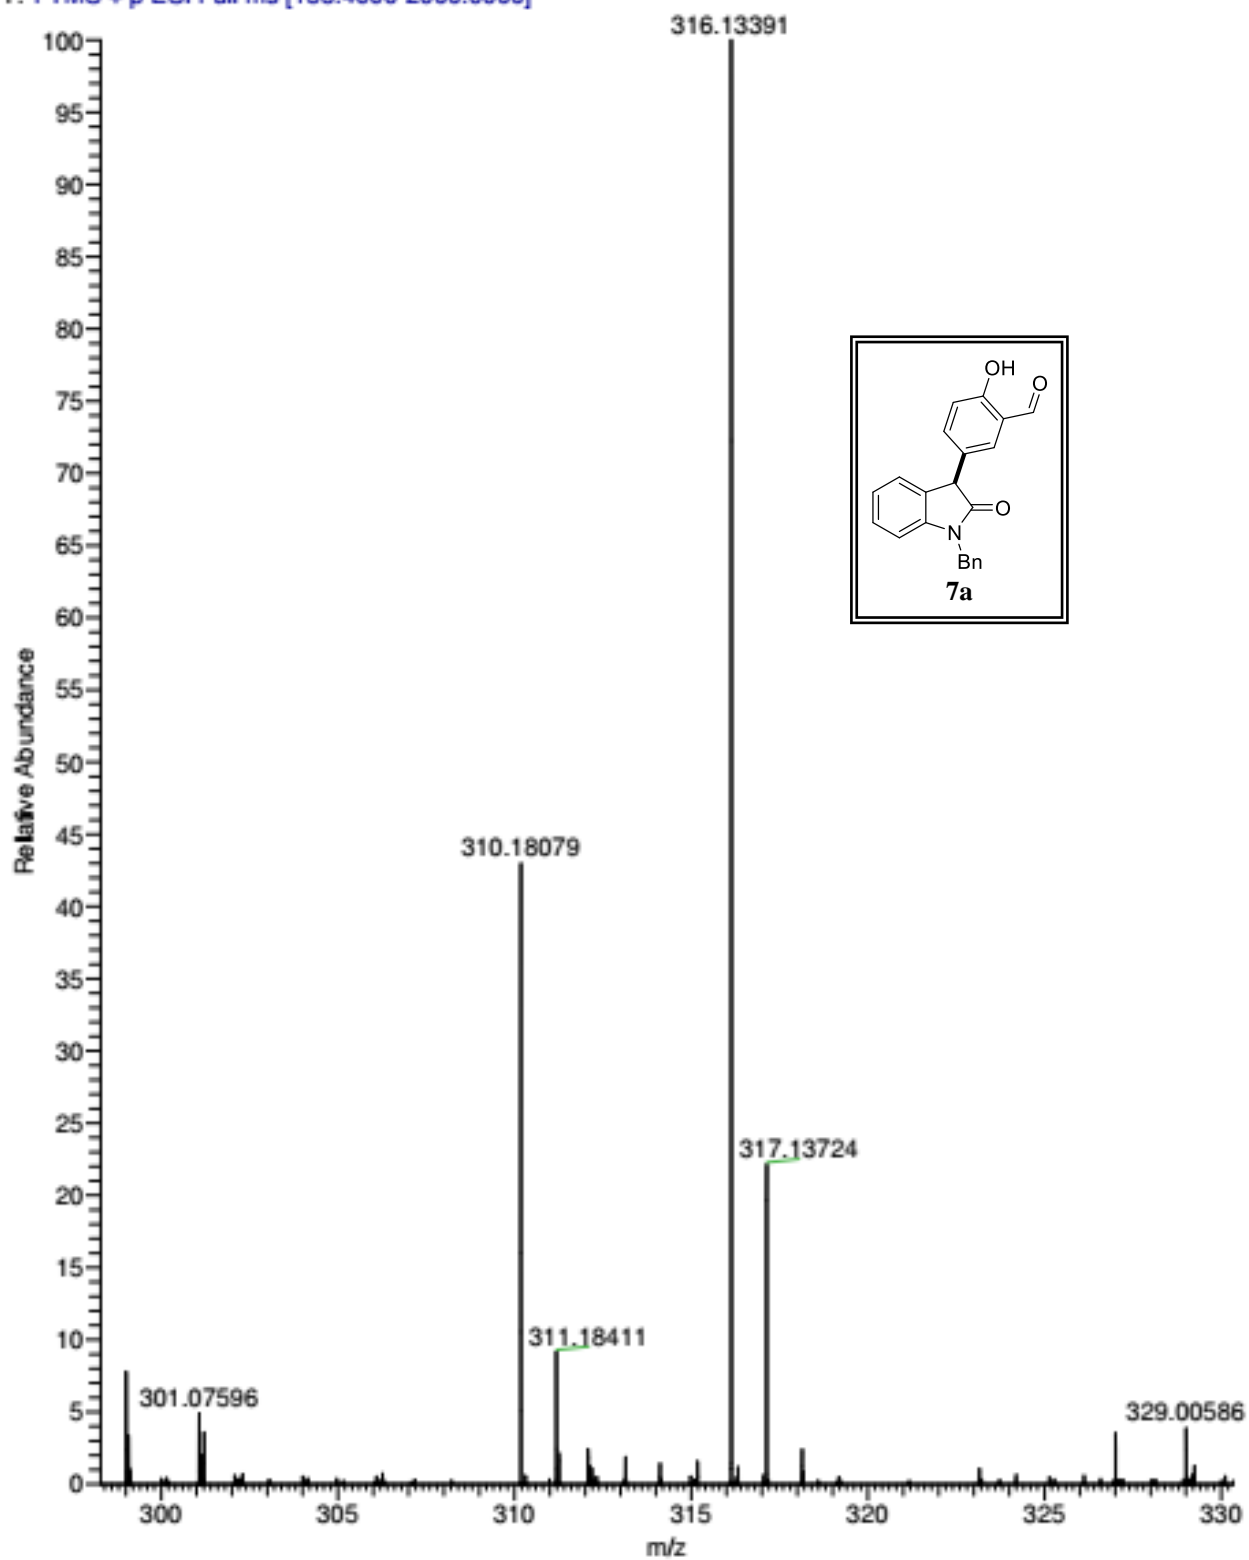

# Compound 7b

APR-737\_20210505163259 #40 RT: 0.39 AV: 1 NL: 1.09E9

T: FTMS + p ESI Full ms [133.4000-2000.0000]

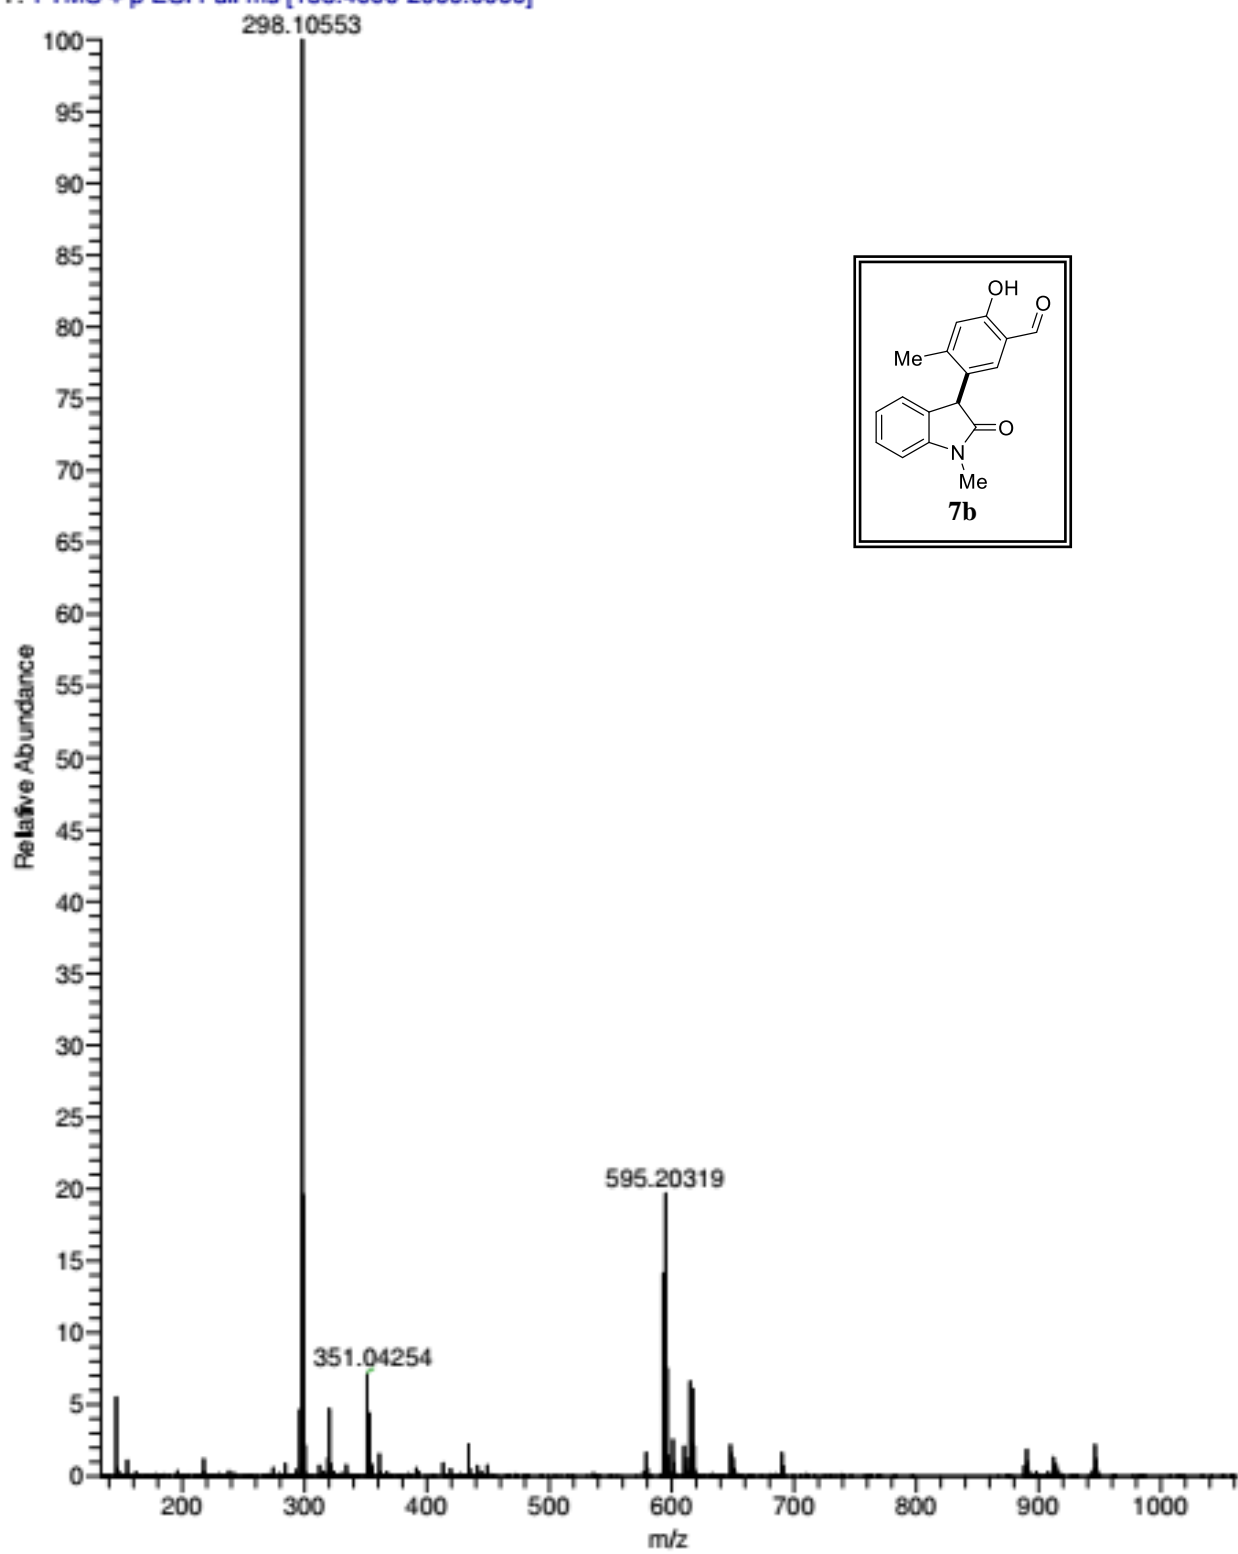

# Compound 7c

APR-735 #40 RT: 0.39 AV: 1 NL: 2.56E9  
T: FTMS + p ESI Full ms [133.4000-2000.0000]

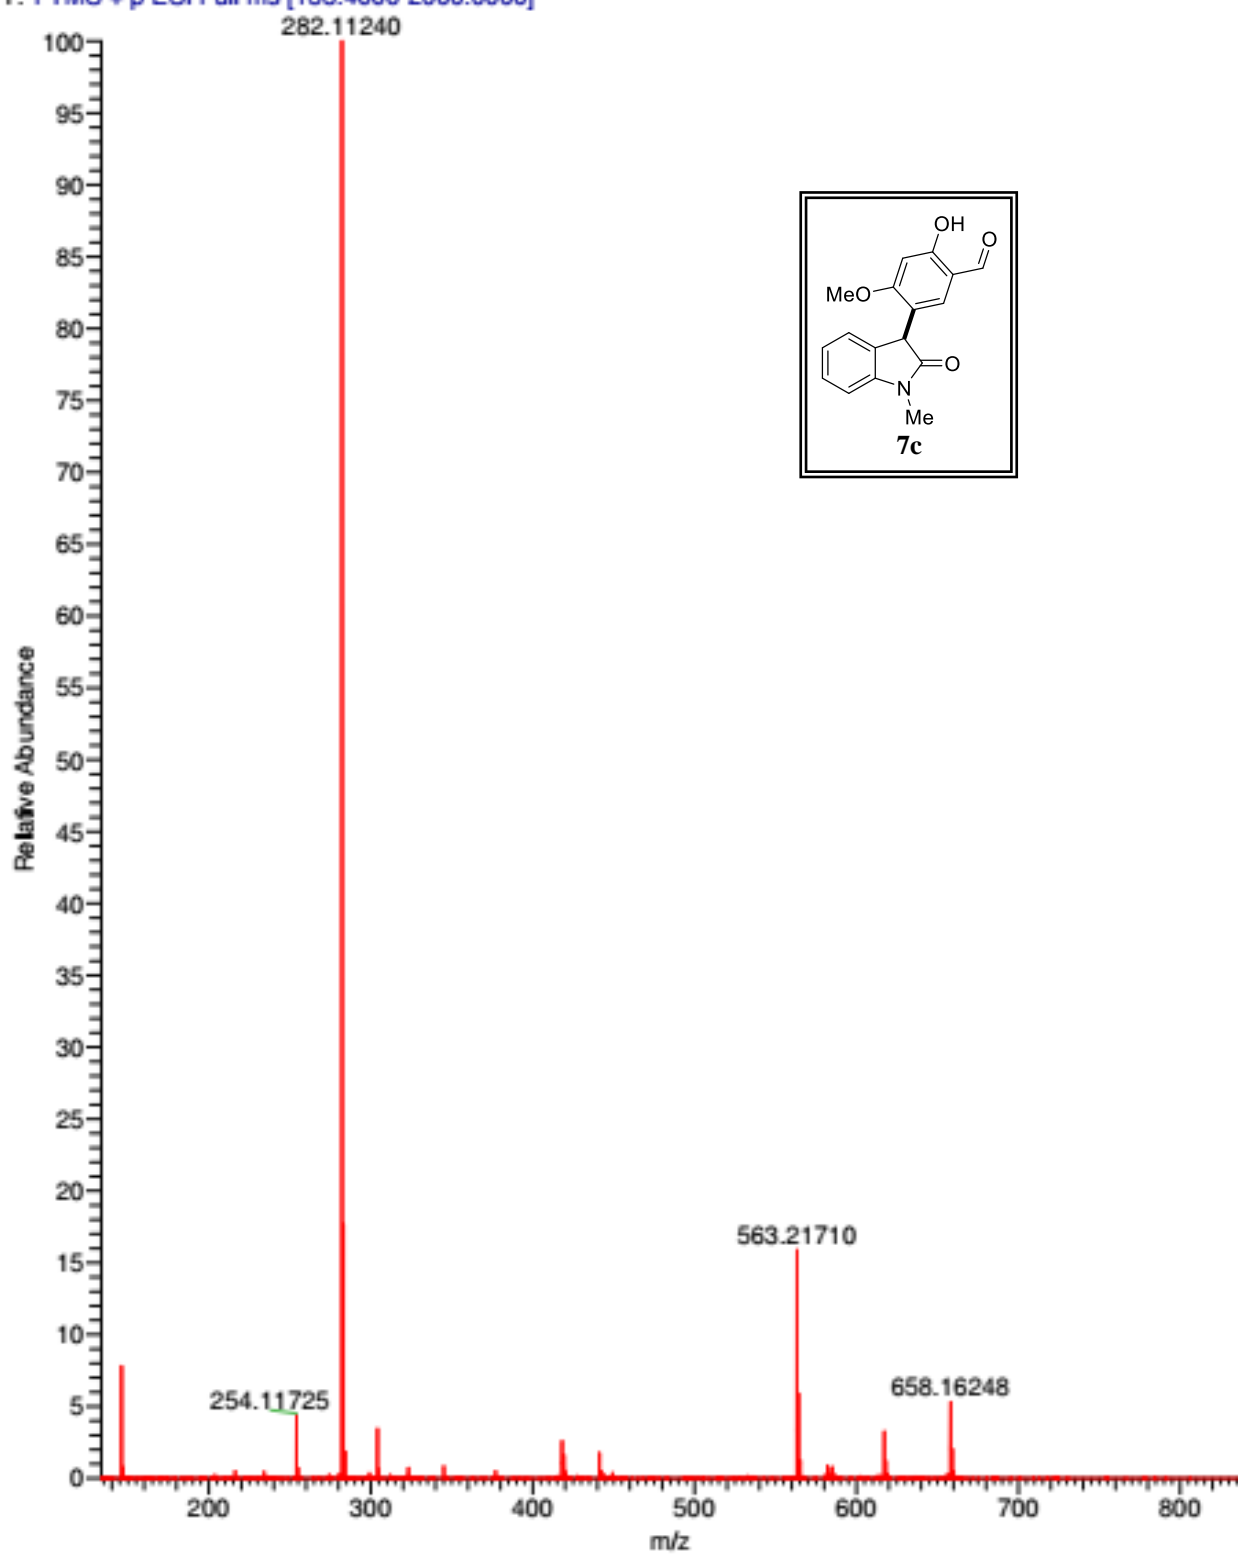

# Compound 7d

APR-739\_20210505164136 #94 RT: 0.91 AV: 1 NL: 2.00E8

T: FTMS + p ESI Full ms [133.4000-2000.0000]

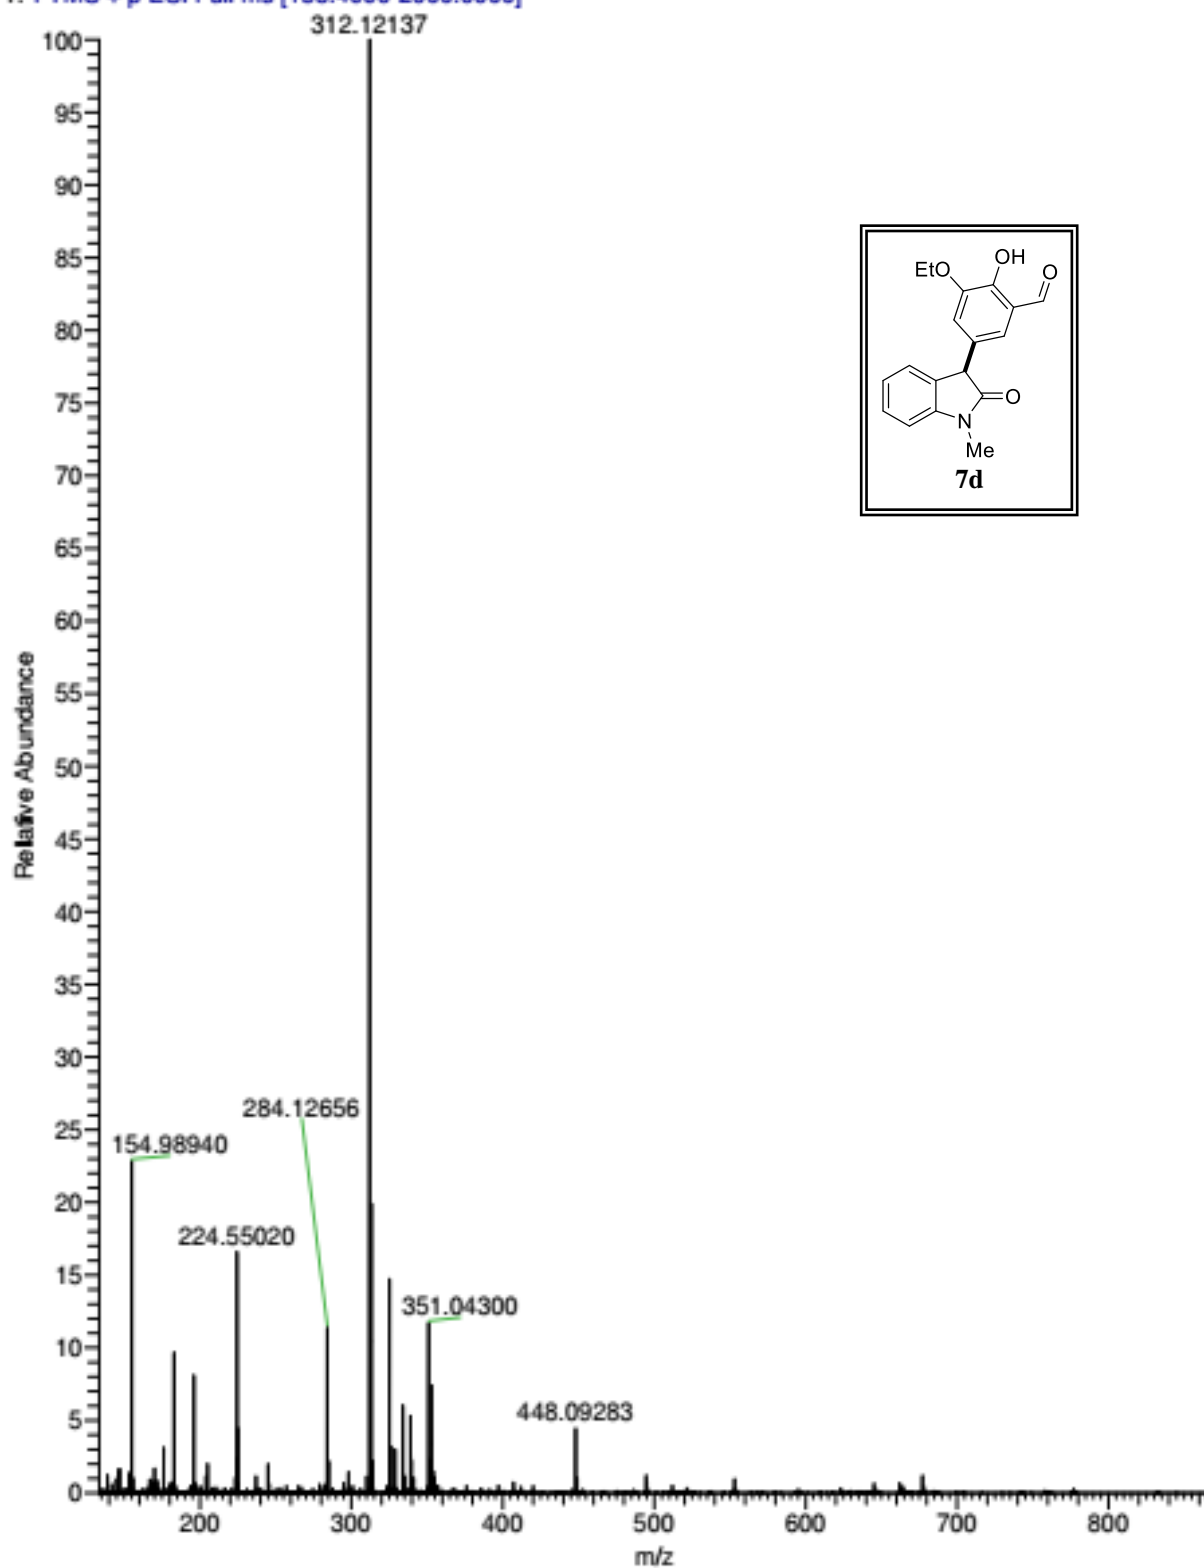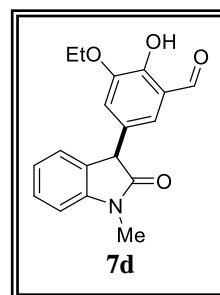

# Compound 8

APR-815\_220211174005 #605 RT: 5.60 AV: 1 NL: 4.33E7

F: ITMS + c ESI Full ms[150.00-2000.00]

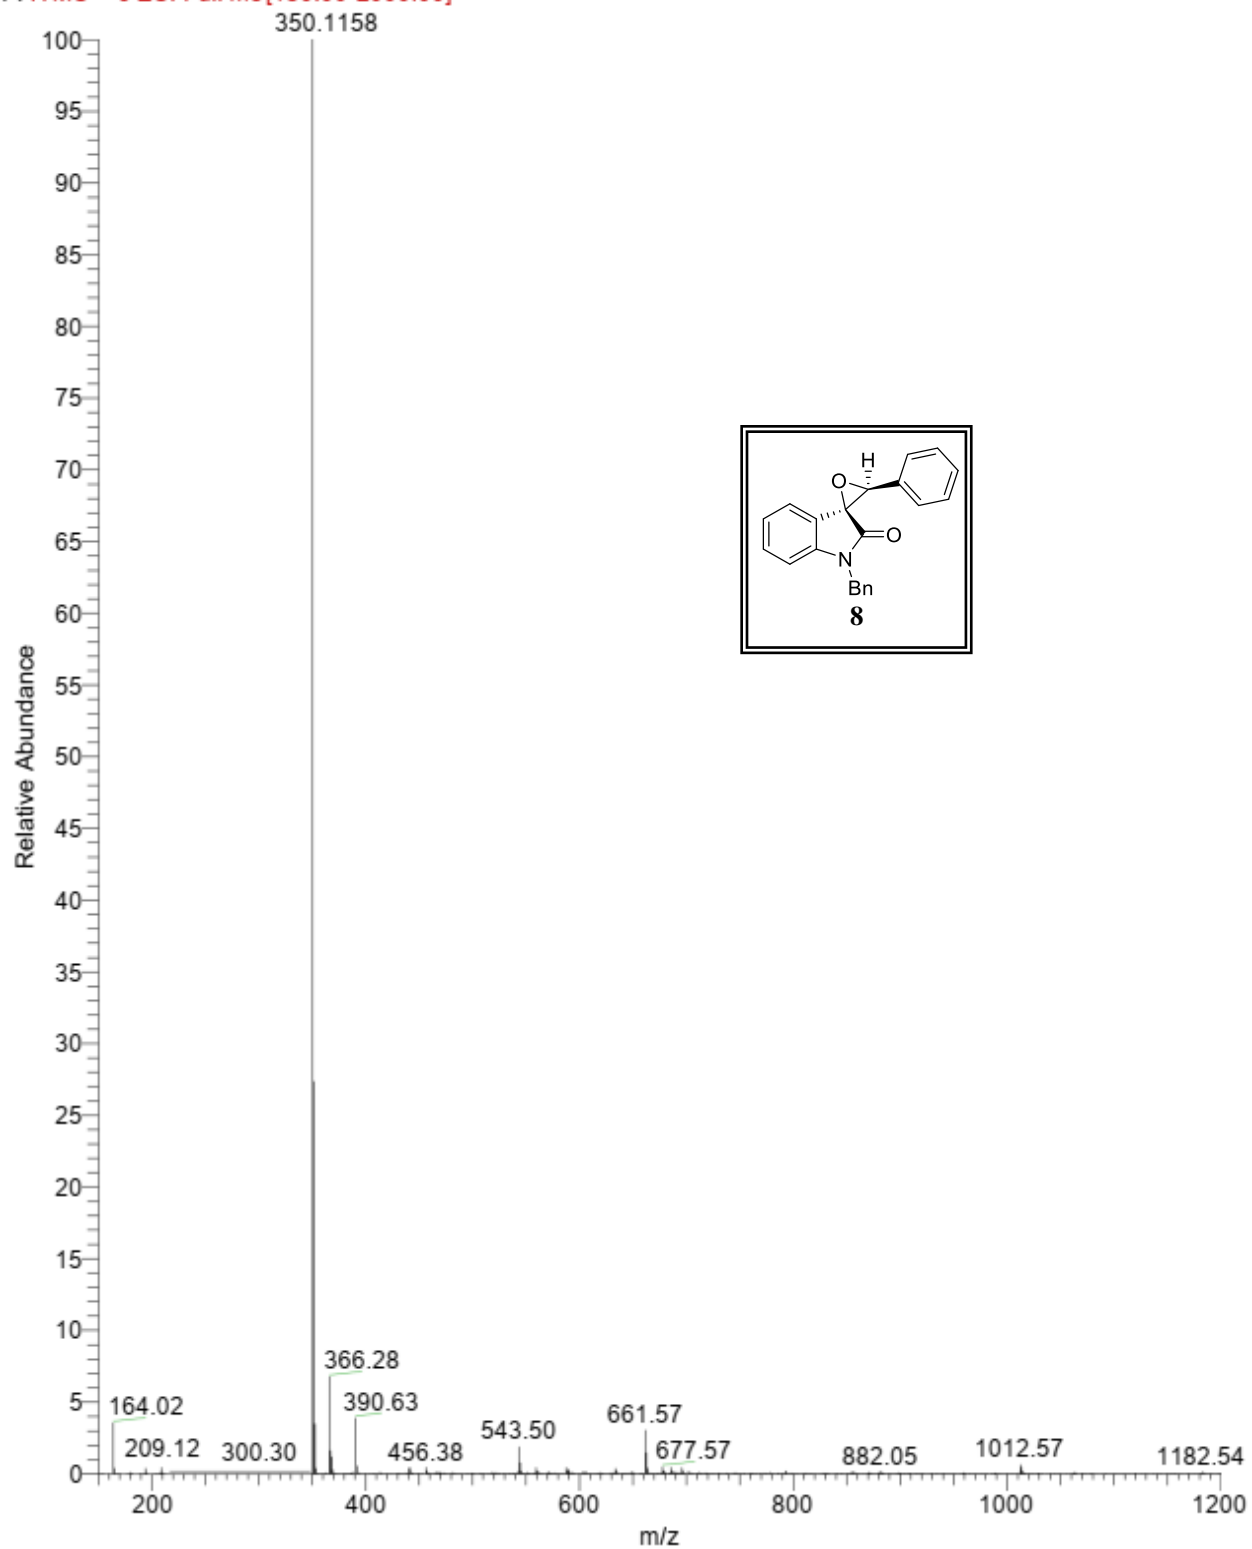

Supplement: d2ob00003b2.pdf [file d2ob00003b2.pdf]
